1           **Genetic Engineering of *Treponema pallidum* subsp. *pallidum*, the Syphilis Spirochete**

2

3                   Emily Romeis<sup>1</sup>, Lauren Tantalo<sup>1</sup>, Nicole Lieberman<sup>2</sup>, Quynh Phung<sup>2</sup>,

4                                   Alex Greninger<sup>2</sup> and Lorenzo Giacani<sup>1,3\*</sup>

5

6           <sup>1</sup>Department of Medicine, Division of Allergy and Infectious Diseases, University of

7           Washington, Seattle, WA, USA

8           <sup>2</sup>Department of Laboratory Medicine, University of Washington, Seattle, WA, USA

9           <sup>3</sup>Department of Global Health, University of Washington, Seattle, WA, USA

10

11           \*Corresponding Author: [giacal@u.washington.edu](mailto:giacal@u.washington.edu)

12           Short title: First Successful Genetic Manipulation of *T. pallidum*

13

14

15

16

17

18

19

20

21

22

23

24 **Abstract**

25 **Background.** Despite more than a century of research, genetic manipulation of  
26 *Treponema pallidum* subsp. *pallidum* (*T. pallidum*), the causative agent of syphilis, has not been  
27 successful. The lack of genetic engineering tools has severely limited understanding of the  
28 mechanisms behind *T. pallidum* success as a pathogen. A recently described method for *in vitro*  
29 cultivation of *T. pallidum*, however, has made it possible to experiment with transformation and  
30 selection protocols in this pathogen. Here, we describe an approach that successfully replaced the  
31 *tprA* (*tp0009*) pseudogene in the SS14 *T. pallidum* strain with a kanamycin resistance (*kan<sup>R</sup>*)  
32 cassette.

33 **Principal findings.** A suicide vector was constructed using the pUC57 plasmid  
34 backbone. In the vector, the *kan<sup>R</sup>* gene was cloned downstream of the *tp0574* gene promoter. The  
35 *tp0574*prom-*kan<sup>R</sup>* cassette was then placed between two 1-kbp homology arms identical to the  
36 sequences upstream and downstream of the *tprA* pseudogene. To induce homologous  
37 recombination and integration of the *kan<sup>R</sup>* cassette into the *T. pallidum* chromosome, *in vitro*-  
38 cultured SS14 strain spirochetes were exposed to the engineered vector in a CaCl<sub>2</sub>-based  
39 transformation buffer and let recover for 24 hours before adding kanamycin-containing selective  
40 media. Integration of the *kan<sup>R</sup>* cassette was demonstrated by qualitative PCR, droplet digital PCR  
41 (ddPCR), and whole-genome sequencing (WGS) of transformed treponemes propagated *in vitro*  
42 and *in vivo*. ddPCR analysis of RNA and mass spectrometry confirmed expression of the *kan<sup>R</sup>*  
43 message and protein in treponemes propagated *in vitro*. Moreover, *tprA* knockout (*tprA<sup>ko</sup>*-SS14)  
44 treponemes grew in kanamycin concentrations that were 64 times higher than the MIC for the  
45 wild-type SS14 (wt-SS14) strain and in infected rabbits treated with kanamycin.

46           **Conclusion.** We demonstrated that genetic manipulation of *T. pallidum* is attainable. This  
47 discovery will allow the application of functional genetics techniques to study syphilis  
48 pathogenesis and improve syphilis vaccine development.

49

## 50 **Author Summary**

51           Syphilis is still an endemic disease in many low- and middle-income countries, and it has  
52 been resurgent in high-income nations for almost two decades. In endemic areas, syphilis causes  
53 significant morbidity and mortality, particularly when its causative agent, the spirochete  
54 *Treponema pallidum* subsp. *pallidum* (*T. pallidum*) is transmitted to the fetus during pregnancy.  
55 A better understanding of *T. pallidum* biology and syphilis pathogenesis would help devise better  
56 control strategies for this infection. One of the limitations associated with working with *T.*  
57 *pallidum* was our inability to genetically alter this pathogen to evaluate the function of genes  
58 encoding virulence factors or create attenuated strains that could be useful for vaccine  
59 development. Here, we report a transformation protocol that allowed us to replace a specific  
60 region of the *T. pallidum* genome containing a pseudogene (i.e., a non-functional gene) with a  
61 stably integrated kanamycin resistance gene. To our knowledge, this is the first-ever report of a  
62 method to achieve a genetically modified *T. pallidum* strain and, as such, it can revolutionize  
63 research in the syphilis field.

64

## 65 **Introduction**

66           Syphilis is a chronic sexually transmitted infection that still represents a significant  
67 burden for public health as it causes significant morbidity and mortality worldwide. The World  
68 Health Organization (WHO) estimates that syphilis global incidence ranges between 5.6 to 11

69 million new cases every year, while disease prevalence is between 18 to 36 million cases  
70 worldwide [1, 2]. Although most of those cases occur in low- and middle-income countries  
71 where the disease is endemic, syphilis rates have been steadily increasing in high-income  
72 countries for decades now, including in the US. In these countries, mainly men who have sex  
73 with men (MSM) and persons living with HIV (PLHIV) are affected [3-8]. In the US, the rate of  
74 early syphilis in 2019 (11.9 cases per 100,000 population), represented a 460% increase  
75 compared to the cases reported in 2000 (2.1 cases per 100,000 population) [3]. If untreated,  
76 syphilis can progress to affect the patient's cardiovascular and central nervous systems, possibly  
77 leading to serious manifestations such as aortic aneurism, stroke, hearing or visual loss,  
78 dementia, and paralysis [9]. Because *T. pallidum* can cross the placental barrier, mother-to-child  
79 transmission of syphilis during pregnancy accounts for up to 50% of stillbirths in sub-Saharan  
80 Africa and a high proportion of perinatal morbidity and mortality cases [10].

81         A better understanding of *T. pallidum* biology and syphilis pathogenesis would help in  
82 devising more effective measures for disease control. Recently, Edmondson *et al.* [11] described  
83 a method to continually propagate *T. pallidum in vitro* using a cell culture-based system  
84 previously pioneered by Fieldsteel *et al.* [12]. This method represented a major advancement in  
85 the field, in that it provided investigators with an alternative to the propagation of treponemal  
86 strains in laboratory rabbits. Despite such advancement, a limitation in the study of *T. pallidum*  
87 remained the lack of tools for genetic modification of this pathogen. The availability of the  
88 cultivation system, however, paved the way to experimenting with transformation and selection  
89 procedures to introduce foreign DNA into the *T. pallidum* genome.

90         Here, we describe a protocol that allowed us to integrate a kanamycin resistance (*kan<sup>R</sup>*)  
91 cassette into a pseudogene (*tprA*, encoded by the *tp0009* gene) of the *T. pallidum* SS14 strain. In

92 the SS14 strain, the *tprA* gene is non-functional due to a frame-shift mutation caused by a CT  
93 dinucleotide deletion at position 712 of the annotated gene open reading frame (ORF), even  
94 though syphilis strains with a functional *tprA* gene are known, such as the Sea81-4 strain [13].  
95 The choice to derive a *tprA* knockout (*tprA*<sup>ko</sup>-SS14) strain was driven by the high likelihood that  
96 a) this region would not affect *T. pallidum* viability if removed, being already non-functional in  
97 the wild-type SS14 (wt-SS14) strain, and that b) eliminating this pseudogene would not result in  
98 a polar effect inhibiting transcription of downstream genes. The *tprA* locus, even when encoding  
99 a functional gene, is likely to be transcribed as a monocistronic mRNA based on prediction  
100 software such as Operon-mapper ([https://biocomputo.ibt.unam.mx/operon\\_mapper/](https://biocomputo.ibt.unam.mx/operon_mapper/)). To this  
101 end, we used a pUC57-based suicide vector where the *kan*<sup>R</sup> gene was placed between two ~1 kbp  
102 homology arms identical to the regions upstream (998 bp) and downstream (999 bp) of the *tprA*  
103 frameshifted ORF, respectively. To drive expression of the *kan*<sup>R</sup> gene, the promoter of the  
104 *tp0574* gene (encoding the 47 kDa lipoprotein), previously identified by Weigel *et al.* [14], was  
105 chosen based on experimental evidence that *tp0574* is among the most highly transcribed genes  
106 in *T. pallidum*, and is possibly expressed constitutively in this pathogen [15, 16]. Following  
107 transformation using a CaCl<sub>2</sub>-based buffer and selection, qualitative PCR was used to confirm  
108 integration of the *tp0574*prom-*kan*<sup>R</sup> construct within the *tprA* locus by priming from sequences  
109 outside of the homology arms not cloned into the vector. Transformants were shown to grow *in*  
110 *vitro* in a kanamycin concentration (200 µg/ml) 64 times higher than the minimal inhibitory  
111 concentration (MIC) of this antibiotic for the wt-SS14 strain (3.1 µg/ml), as well as in rabbits  
112 infected intratesticularly (IT) and treated with pharmaceutical-grade kanamycin twice a day for  
113 10 consecutive days post-infection. Replacement of the *tprA* pseudogene with the *tp0574*prom-  
114 *kan*<sup>R</sup> construct was confirmed by whole-genome sequencing from *in vitro*-cultivated treponemes

115 as well as quantitative droplet digital PCR (ddPCR) targeting the *kan<sup>R</sup>* gene and the *tp0574*,  
116 *tp0001* (*dnaA*), and *tprA* genes in the treponemal chromosome. Message levels of the *tp0574* and  
117 *kan<sup>R</sup>* genes, transcribed in the *tprA<sup>ko</sup>*-SS14 by the same promoter, were also evaluated by RT-  
118 ddPCR from *in vitro*-grown strains. Expression of the Kan<sup>R</sup> protein in the *tprA<sup>ko</sup>*-SS14 strain but  
119 not in wt-SS14 was demonstrated by mass spectrometry (MS).

120 Although we ablated a pseudogene, which did not allow us to obtain a mutant lacking a  
121 known phenotype to be evaluated through functional assays, the ability to transform and  
122 manipulate *T. pallidum* using CaCl<sub>2</sub> and an appropriately engineered vector is a significant step  
123 forward in the field. Our discovery opens numerous possibilities, including classical genetic  
124 studies in this pathogen, the long-awaited application of functional genomics techniques, and  
125 even the possibility of targeting virulence factors responsible for immune evasion and  
126 persistence to obtain an attenuated strain for vaccine development.

127

## 128 **Results**

### 129 **Transformation and selection of *T. pallidum***

130 The pUC57-based *ptprAarms-tp0574prom-kan<sup>R</sup>* plasmid construct was used to transform  
131 wt-SS14 treponemes. Transformed *T. pallidum* cells were subsequently propagated in  
132 kanamycin-supplemented media (25 µg/ml, effective on selection experiments of other  
133 spirochetes). Because the transformation buffer contained CaCl<sub>2</sub> to increase membrane  
134 permeability and facilitate plasmid intake, we also exposed wt-SS14 cells to transformation  
135 buffer alone (without plasmid, to exclude CaCl<sub>2</sub> lethality for the treponemes) and proceeded to  
136 propagate these cells in culture media with no antibiotic. Furthermore, to ensure that non-  
137 transformed treponemes would not survive exposure to kanamycin at the concentration used for

138 *in vitro* selection, the wt-SS14 strain was also propagated in media containing 25 µg/ml of  
139 kanamycin. Due to the long generation time of the SS14 strain (~44 hours), *T. pallidum* cells  
140 were sub-cultured every 14 days instead of every week until Passage #7 (Week 12 post-  
141 transformation; Fig.1), and weekly thereafter. Transformed *tprA*<sup>ko</sup>-SS14 treponemes could be  
142 microscopically counted 2 weeks post-transformation (Fig.1; Passage #2), even though only 2.4  
143 treponemes per dark-field microscope (DFM) field could be seen at this time (corresponding to a  
144 concentration of 2.4x10<sup>6</sup> *T. pallidum* cells/ml). For transformed treponemes, cell density  
145 increased four weeks post-transformation and remained steady throughout Passage #6 (Week 10  
146 post-transformation). During this window (Passage #2-6), the average number of treponemes  
147 counted was 2.8x10<sup>7</sup> cells/ml. The density of wt-SS14 treated with CaCl<sub>2</sub> alone was higher than  
148 that of *tprA*<sup>ko</sup>-SS14 cells already at Passage #2 (Week 2 post-exposure; Fig.1), suggesting that  
149 treponemes were not harmed by CaCl<sub>2</sub>. Propagation of this strain was halted at Passage #6  
150 (Week 10 post-exposure; Fig.1). Wild-type SS14 cells propagated in kanamycin-containing  
151 media could not be seen on the DFM over 10 weeks of propagation, confirming the ability of 25  
152 µg/ml kanamycin to inhibit *T. pallidum* growth *in vitro*. During Passage #7-10, the *tprA*<sup>ko</sup>-SS14  
153 treponemal inoculum was increased to obtain enough cells for subsequent experiments. During  
154 these passages, the average number of treponemal cells counted was 2.8x10<sup>8</sup> cells/ml. Overall,  
155 these data support that a kanamycin-resistant strain was obtained due to the transformation of the  
156 wt-SS14 strain with the *ptprAarms-tp0574prom-kan*<sup>R</sup> vector.

157

158

159

160 **Qualitative PCR, and quantitative ddPCR to confirm integration of the *kan<sup>R</sup>* gene**  
161 **and qualitative RT-PCR to evaluate *kan<sup>R</sup>* gene expression**

162 At Passage #8 (Week 13 post-transformation; Fig.1), *tprA<sup>ko</sup>*-SS14 cells were harvested  
163 and processed for a) PCR to confirm integration of the *kan<sup>R</sup>* gene into the *tprA* locus, b) RT-PCR  
164 to assess the presence of message for the *kan<sup>R</sup>* gene, and c) for quantitative ddPCR to evaluate  
165 the ratio between the *kan<sup>R</sup>* gene and three other targets: *tprA* (*tp0009*), *dnaA* (*tp0001*), and  
166 *tp0574*. Samples from the wt-SS14 propagated in parallel to the *tprA<sup>ko</sup>*-SS14 strain were used as  
167 control. A qualitative, long-range PCR approach was first used to confirm integration of the  
168 *tp0574*prom-*kan<sup>R</sup>* sequence into the *tprA* locus, according to the schematic reported in Fig.2A.  
169 To this end, primers annealing to the *T. pallidum* genomic region flanking the *tprA* homology  
170 arms of the construct and to the *kan<sup>R</sup>* gene, respectively, were employed. In these reactions,  
171 DNA samples extracted from *tprA<sup>ko</sup>*-SS14 cells as well as from wt-SS14 were amplified with  
172 primer pairs 1+2, 3+4, 1+3, 5+6, and 2+4 (Fig.2A; primer sequences in Table 1). Amplification  
173 of the *tp0574* gene was performed as a positive control. As expected, amplification using primer  
174 pairs 1+2 and 3+4 (Fig.2B, sub-panels a and b, respectively) yielded a positive result only when  
175 the *tprA<sup>ko</sup>*-SS14 DNA was used as the template, showing that integration of the *kan<sup>R</sup>* gene  
176 occurred. Amplification of the *kan<sup>R</sup>* gene was positive only from DNA extracted from the *tprA<sup>ko</sup>*-  
177 SS14, and the transformation plasmid DNA, used as positive control (sub-panel c), while  
178 negative amplification using the 5+6 primer pair (annealing to the vector backbone; sub-panel d)  
179 showed no residual plasmid in the *tprA<sup>ko</sup>*-SS14 culture and that the *kan<sup>R</sup>* amplicon (in sub-panel  
180 c) was not due to residual vector used for transformation weeks earlier. When used together,  
181 primers 2+4 generated a 3,746 bp amplicon with the *tprA<sup>ko</sup>*-SS14 strain DNA template (sub-  
182 panel e), which was the expected size if the small *kan<sup>R</sup>* gene (816 bp in size) replaced the *tprA*



183 pseudogene (1,821 bp), and a 4,643 bp amplicon in the wild-type and undetectable residual wt-  
184 SS14 in the *tprA*<sup>ko</sup>-SS14 culture wells. As expected, the amplification of the *tp0574* gene was  
185 uniformly positive for both the transformed and wild-type strain (sub-panel f). Overall, these  
186 data showed that the *kan*<sup>R</sup> gene was integrated into the *tprA*<sup>ko</sup>-SS14 strain genome in place of the  
187 *tprA* pseudogene and no residual plasmid could be amplified from the culture.

188 RNA extracted from the *tprA*<sup>ko</sup>-SS14 and wt-SS14 strain (Passage 8, Week 13 post-  
189 transformation; Fig.1) was DNaseI-treated to eliminate residual DNA and reverse transcribed.  
190 cDNA was used as template to assess transcription of the *kan*<sup>R</sup> gene and *tp0574* genes, as well as  
191 the *tprA* gene. Previous studies on other *T. pallidum* strains with a *tprA* pseudogene suggested  
192 that this locus is transcribed at a very low level in these strains, even though the coding sequence  
193 contains a frameshift that would truncate the resulting peptide during translation [13]. Results  
194 (Fig.2B) showed that the *kan*<sup>R</sup> gene is expressed only in the *tprA*<sup>ko</sup>-SS14 (sub-panel g). As  
195 expected, *tp0574* was expressed in both strains (sub-panel h). *tprA*-specific mRNA could not be  
196 detected in either sample from the *tprA*<sup>ko</sup>- and wt- cultures harvested at this time point; however,  
197 in samples harvested in subsequent passages, *tprA*-specific message was detected in wt-SS14  
198 propagated alongside the *tprA*<sup>ko</sup>-SS14 strain, but never in the *tprA*<sup>ko</sup>-SS14 strain. These results  
199 supported that the *kan*<sup>R</sup> transgene is actively transcribed from the *tp0574* promoter in the *tprA*<sup>ko</sup>-  
200 SS14 strain while the *tprA* pseudogene is no longer transcribed in this strain due to *tprA* ablation.

201 We next performed droplet digital PCR (ddPCR) on *kan*<sup>R</sup>, *dnaA*, and *tprA* loci in a  
202 separate laboratory to evaluate copy number ratios among these genes. In the *tprA*<sup>ko</sup>-SS14 strain,  
203 the *kan*<sup>R</sup>:*dnaA* ratio was equal to 1.05, while the *tprA*:*dnaA* ratio was virtually zero (0.006;  
204 Fig.3). These data reiterated that a) integration of the *kan*<sup>R</sup> gene occurred in the *tprA* locus, b)  
205 that this replacement was stable, and c) that no extra copies of the *kan*<sup>R</sup> gene existed outside of

206 the *T. pallidum* genome. On the contrary, when the wt-SS14 DNA was used as template, the

207 *tprA:dnaA* was 1.01, while the *kan<sup>R</sup>:dnaA* ratio was also virtually zero (0.005; Fig.3).

208

209 **Table 1. Primers used in this study**

| Target gene; application                                                                                            | Forward (F) and reverse (R) primer sequences (5'-3'), and probe (P) if applicable                        | Amplicon length (bp)                                             | Primer ID (Figure 1) |
|---------------------------------------------------------------------------------------------------------------------|----------------------------------------------------------------------------------------------------------|------------------------------------------------------------------|----------------------|
| Left <i>tprA</i> flanking region (F primer), <i>kan<sup>R</sup></i> (R primer); qualitative PCR and sequencing      | (F) GGTAATGGGCTCTGGGGTAT<br>(R) ATTCCGACTCGTCCAACATC                                                     | 2,289                                                            | #1 (F)<br>#2 (R)     |
| <i>kan<sup>R</sup></i> (F primer), Right <i>tprA</i> flanking region (R primer); qualitative PCR and sequencing (F) | (F) GAGCCATATTCAACGGGAGA<br>(R) TCGCAGCAGCAACAAGTAAC                                                     | 2,120                                                            | #3 (F)<br>#4 (R)     |
| <i>kan<sup>R</sup></i> ; qualitative PCR and RT-PCR                                                                 | (F) GAGCCATATTCAACGGGAGA<br>(R) ATTCCGACTCGTCCAACATC                                                     | 663                                                              | #1 (F)<br>#3 (R)     |
| Left <i>tprA</i> flanking region (F primer), Right <i>tprA</i> flanking region (R primer); qualitative PCR          | (F) ATTCCGACTCGTCCAACATC<br>(R) TCGCAGCAGCAACAAGTAAC                                                     | 3,746 or<br>4,643<br>( <i>tprA<sup>ko</sup>/wt<sup>1</sup></i> ) | #2 (F)<br>#4 (R)     |
| <i>tp0574</i> ; qualitative PCR and RT-PCR                                                                          | (F) TGTGGCTCGTCTCATCATGA<br>(R) CTGGGCCACTACCTTCGCAC                                                     | 313                                                              |                      |
| <i>Tp0009</i> ( <i>tprA</i> ); qualitative RT-PCR                                                                   | (F) ATACGAACAGTGCGAGAGCA<br>(R) TCATCTCCCGAACGAGTTTC                                                     | 286                                                              |                      |
| <i>tp0574</i> ; qPCR, RT-qPCR                                                                                       | (F)CAAGTACGAGGGGAACATCG<br>(R) TGATCGCTGACAAGCTTAGG                                                      | 132                                                              |                      |
| <i>tp0574</i> ; ddPCR, and RT-ddPCR                                                                                 | (F) CAAGTACGAGGGGAACATCG<br>(R) CACCGCTTGATCTCTGACA<br>(P) HEX-TGCAGCATCCATCAGAGTCTCCG-BkFQ <sup>2</sup> | 139                                                              |                      |
| <i>kan<sup>R</sup></i> ; ddPCR, and RT-ddPCR                                                                        | (F) CACTCAGGCGCAATCAC<br>(R) CCAGACTTGTTCAACAGGC<br>(P) FAM-ACGGTTTGTTGATGCGAGTGATTT-BkFQ                | 91                                                               |                      |
| <i>tp0001</i> ( <i>dnaA</i> ); ddPCR,                                                                               | (F) CTCATGGAAATACTGCTCC<br>(R) CGGATACAAAGTTCTCGAAG<br>(P) FAM-AGCTTTCACCCCGACCTGAAC-BkFQ                | 135                                                              |                      |
| <i>tprA</i> ; ddPCR                                                                                                 | (F) TACGCGGTAACCAATCTTCC<br>(R) GCTTCTACGGCGCATATCTC<br>(P) HEX-CGTATTGGGTGTCTGCTTCCTTGATC-BkFQ          | 158                                                              |                      |
| <i>tp0574</i> promoter; sequencing                                                                                  | (F) AGCGGATCCTCCCAAAAAGA<br>(R) GATTACACCTCCGTATAGAG                                                     | N/A                                                              |                      |
| <i>tprA</i> homology arms; sequencing                                                                               | (F) TGCAACCATCTTCGATTACG<br>(R) CGTATGCTTTTACCCGCTGT                                                     | N/A                                                              |                      |
| pUC57 vector primers; sequencing, assessing plasmid carry-over                                                      | (F) TAAAACGACGGCCAGTGAAT<br>(R) GACCATGATTACGCCAAGC                                                      | 3,036                                                            | #5 (F)<br>#6 (R)     |

210 <sup>1</sup>Wild type

211 <sup>2</sup>Black hole fluorescence quencher

212

213

214

## 215 **Whole-genome sequencing from *in vitro*-propagated *tprA*<sup>ko</sup>-SS14 treponemes**

216 At Passage #9 (Week 14 post-transformation; Fig.1), treponemes were harvested for  
217 whole-genome sequencing (WGS) using a custom hybridization capture panel to enrich for *T.*  
218 *pallidum*. Genome sequencing showed the absence of the *tprA* ORF in the *tprA*<sup>ko</sup>-SS14 strain  
219 when read assembly was performed using the wt-SS14 genome (Fig.4A). However, when  
220 assembly used a template genome where *tprA* was replaced with the *kan*<sup>R</sup> gene, results showed  
221 replacement of *tprA* with the *tp0574*promoter-*kan*<sup>R</sup> sequence (Fig.4B). The wild-type SS14  
222 propagated in parallel to the knockout strain was also sequenced as a control. In the wt-SS14, the  
223 *tprA* locus is intact (Fig.4C), while a gap appeared when reads from the wt-SS14 strain were  
224 assembled to the *tprA*<sup>ko</sup>-SS14 strain genome with *kan*<sup>R</sup> in place of *tprA*. Because our sequencing  
225 approach used enrichment probes based on multiple wild-type *T. pallidum* genomes and did not  
226 include probes for the *kan*<sup>R</sup> gene, coverage of the *kan*<sup>R</sup> gene (Fig.4B) was slightly lower than the  
227 average for the other regions of the *T. pallidum* genome (Fig.4B). These results showed again  
228 that the *kan*<sup>R</sup> gene replaced the *tprA* locus in the *tprA*<sup>ko</sup>-SS14 strain. A search for reads matching  
229 to the plasmid backbone was also conducted but yielded no mapping reads, showing lack of  
230 residual plasmid in the culture.

231

## 232 **Kanamycin susceptibility assay**

233 *tprA*<sup>ko</sup>-SS14 were grown in 25 µg/ml of kanamycin during routine propagation, a  
234 concentration shown to be treponemicidal for the wild-type (Fig.1). To demonstrate that the  
235 *tprA*<sup>ko</sup>-SS14 strain could grow at significantly higher kanamycin concentration, *tprA*<sup>ko</sup>-SS14 cells  
236 harvested at Passage #10 (Week 15 post-transformation; Fig.1) were used to further assess  
237 resistance to kanamycin by performing an *in vitro* susceptibility assay. To this end, we grew both

238 the wt-SS14 and *tprA*<sup>ko</sup>-SS14 strains in media supplemented with kanamycin ranging from 200  
239 to 1.6 µg/ml, for a total of 8 different concentrations tested in 8 replicate wells. Quantification of  
240 treponemal burden, measured by qPCR targeting the *tp0574* gene showed that media  
241 supplemented with 200 down to a MIC of 3.13 µg/ml of kanamycin strongly inhibited the  
242 growth of the wild-type strain when compared to no-antibiotic wells (Fig.5A), but did not affect  
243 the *tprA*<sup>ko</sup>-SS14 strain, which grew as if no antibiotic was added (Fig.5B), thus confirming that  
244 *tprA*<sup>ko</sup>-SS14 treponemes had become resistant to kanamycin. Furthermore, the *tprA*<sup>ko</sup>-SS14 strain  
245 also appeared to have a growth advantage compared to the wild-type strain. When growth was  
246 compared at day 7 post-inoculation using the no-antibiotic wells, the *tprA*<sup>ko</sup>-SS14 was shown to  
247 have grown significantly faster than the wild-type, with an average of ~12,000 genome copies/µl,  
248 compared to the ~4,300 copies of the wild-type strain ( $p < 0.05$ ), even though the initial inoculum  
249 size was the same. As a control, DNA extracted from the eight *tprA*<sup>ko</sup>-SS14 replicate cultures  
250 grown in 200 µg/ml of kanamycin was amplified using primers specific for the backbone of the  
251 pUC57 plasmid (pair #5/6, as shown in Fig.2A), to ensure no residual plasmid was present in  
252 these cultures. All these amplifications yielded a negative result unless the *ptprA*arms-  
253 *tp0574*prom-*kan*<sup>R</sup> construct was used as positive control (Fig.5C), confirming no presence of  
254 residual plasmid in these cultures. When the same DNA was tested with primers flanking the  
255 *tprA* homology arms, the *tprA*<sup>ko</sup>-SS14 cultures yielded a ~3.7Kbp amplicon, expected due to the  
256 replacement of the *tprA* locus with the shorter *kan*<sup>R</sup> sequence, while the wt-SS14 strain DNA  
257 yielded a ~4.6 Kbp amplicon (Fig.5D).

258 The ratio *kan*<sup>R</sup>:*dnaA* in the *tprA*<sup>ko</sup>-SS14 cultures grown at different kanamycin  
259 concentrations estimated by ddPCR ranged between 1.07 and 1.14 (Fig.6A) on average. On the  
260 contrary, in wt-SS14 the *kan*<sup>R</sup>:*dnaA* ratio was zero. In the *tprA*<sup>ko</sup>-SS14 cultures, the *tprA*:*dnaA*

261 ratio was virtually zero (0.004; Fig.6B), while the *tprA:dnaA* ratio was 1.18 on average (Fig.6B).  
262 The ratio *kan<sup>R</sup>:tp0574* in *tprA<sup>ko</sup>*-SS14 grown in different kanamycin concentrations, was shown  
263 to be in average 1.40 in treponemes analyzed after 7 days in culture, and slightly higher (1.66) in  
264 treponemes harvested after 4 days in culture (Fig.6C), although this difference was not  
265 significantly different. This result suggested that more copies of the *kan<sup>R</sup>* gene than the *tp0574*  
266 gene were present in the extracted DNA at sample harvest. This was overall an expected result.  
267 The replacement of the *tprA* pseudogene (*tp0009*) in the SS14 strain, in fact, positioned the *kan<sup>R</sup>*  
268 gene in proximity (within 10 Kbp) of *T. pallidum dnaA*, *dnaN* (*tp0002*), and *gyrA* (*tp0005*) genes  
269 that, in prokaryotes, are markers for the chromosomal origin of replication (*oriC*) [17, 18]. The  
270 >1 ratio *kan<sup>R</sup>:tp0574* in *tprA<sup>ko</sup>*-SS14 grown in culture likely reflects partial replication of some  
271 chromosomes during propagation, and not differences in amplification efficiency. Such  
272 conclusion is also supported by the evidence that in the wild type strain the average *tprA:tp0574*  
273 ratio, obtained using the same samples above, is 1.31. Overall, these results supported that a) the  
274 *kan<sup>R</sup>* gene is stably integrated into *T. pallidum* genome, that b) there are no residual copies of the  
275 *kan<sup>R</sup>* gene present in episomes, that c) no transformation plasmid is still present and that, for  
276 future experiments, d) the copy number of a transgene needs to be compared to that of a  
277 neighboring gene to account for replication-induced bias, particularly if the transgene is close to  
278 *oriC*.

279 Because in the knockout strain the *kan<sup>R</sup>* gene and the *tp0574* gene are transcribed by the  
280 same promoter, cDNA was used to quantify the message level for these two genes. The  
281 *kan<sup>R</sup>:tp0574* message ratio was found to be 0.77, which showed the *tp0547* gene being slightly  
282 more highly expressed than the *kan<sup>R</sup>* gene. This result suggested that the choice of using the  
283 *tp0574* promoter to drive expression of the *kan<sup>R</sup>* gene led to very similar message levels for these

284 genes, as hypothesized during the experimental design of the *ptprAarms-tp0574prom-kan<sup>R</sup>*  
285 plasmid (Fig.6D). Amplification of *kan<sup>R</sup>* message was not detected in the wt-SS14 strain, and no  
286 *tprA* message amplification occurred when cDNA from the knockout strain was used as the  
287 template. *tprA* message was however detected by ddPCR in the wt-SS14 strain. In this case the  
288 *tprA:tp0547* ratio was 0.040, confirming that the level of transcription of the *tprA* pseudogene is  
289 extremely low, compared to *tp0547*.

290

### 291 **Rabbit infection**

292 We next examined how the *tprA<sup>ko</sup>*-SS14 strain acted during *in vivo* infection in the New  
293 Zealand white rabbit model, expecting that the strain would survive kanamycin treatment of the  
294 animal. The rabbit infected with the *tprA<sup>ko</sup>*-SS14 strain developed orchitis of the left testicle on  
295 day 17 post-inoculation. Treponemal yield from the animal was  $1.2 \times 10^8$  *T. pallidum* cells/ml of  
296 testicular extract. At the time of harvest, the animal was seropositive with the *Treponema*  
297 *pallidum* particle agglutination test (TPPA) and the Venereal Disease Research Laboratory  
298 (VDRL) test, confirming the establishment of infection. The control rabbit, infected with the wt-  
299 SS14 strain but not treated, developed orchitis at day 24 post-infection, and the treponemal yield  
300 was  $2.2 \times 10^7$  *T. pallidum* cells/ml of testicular extract. This animal was also TPPA-positive but  
301 VDRL-negative. On day 24 post-infection, the control rabbit infected with the wt-SS14 strain  
302 and subcutaneously treated with kanamycin had not developed orchitis and was euthanized  
303 (repeat intramuscular injection of kanamycin was not allowed by local IACUC). Upon analysis  
304 of the testicular exudate from this animal, treponemes could be seen, suggesting that the  
305 subcutaneous treatment with kanamycin was not completely effective *in vivo* as it was *in vitro*  
306 (Fig.1). From this animal, the treponemal yield was however much lower compared to the other

307 rabbits ( $1.5 \times 10^5$  *T. pallidum* cells/ml, based on detecting 3 treponemal cells in 20 DFM fields).  
308 As a further confirmation of treatment failure, this animal was also TPPA-positive but VDRL  
309 negative. These data suggested that, although the kanamycin concentration achieved in the  
310 rabbits via subcutaneous injection was not completely treponemicidal, *tprA*<sup>ko</sup>-SS14 were less  
311 susceptible to the antibiotic and proliferated faster than the wild-type. DNA extracted from these  
312 treponemal harvests was used for ddPCR targeting the *dnaA*, *tprA*, and *kan*<sup>R</sup> genes. Droplet  
313 Digital PCR showed that for the *tprA*<sup>ko</sup>-SS14 propagated *in vivo*, the *kan*<sup>R</sup>:*dnaA* and *tprA*:*dnaA*  
314 ratios were 1.05 and 0.007, respectively (Fig.7). For the wt-SS14 strain extracted from the  
315 untreated and treated rabbits, respectively, the *kan*<sup>R</sup>:*dnaA* and *tprA*:*dnaA* ratios were 0.00 and  
316 1.02, respectively (untreated rabbit) and 0.00 and 0.83, respectively (ineffectively treated rabbit;  
317 Fig.7). In these samples the *kan*<sup>R</sup>:*tp0574* ratio was also obtained and was found to be 1.30  
318 (*tprA*<sup>ko</sup>-SS14), and 0.000 (wt-SS14, in both the untreated and ineffectively treated animals. All  
319 these *in vivo* ddPCR results are consistent with ratios seen during *in vitro* propagation (Fig.3 and  
320 Fig.6).

321

## 322 **Mass spectrometry**

323 To further confirm the expression of the 31.01 kDa Kan<sup>R</sup> protein, we performed liquid  
324 MS on proteins of the *tprA*<sup>ko</sup>-SS14 and wt-SS14 strains separated by SDS-PAGE and ranging  
325 approximately from 20-45 kDa. This portion of the *T. pallidum* proteome was retrieved through  
326 of band excision from the acrylamide gel to then undergo in-gel tryptic digestion before MS, and  
327 the size range (20-45 kDa) was decided since a distinct ~31 kDa band corresponding to Kan<sup>R</sup>  
328 could not be undoubtedly identified in the Coomassie-stained gel. Nonetheless, MS data analysis  
329 showed that peptides mapping to 77% of the Kan<sup>R</sup> protein could be isolated from the *tprA*<sup>ko</sup>-

330 SS14 strain sample (Fig.8), but not from the paired sample from the wild-type strain. Based on  
331 the MS, the amount of the Kan<sup>R</sup> protein corresponded to ~1% of the total protein content  
332 detected in the specimen. The list of all peptides mapping to the Kan<sup>R</sup> protein is reported in  
333 Table 2. The full MS results for the samples corresponding to the *tprA*<sup>ko</sup>-SS14 and wt-SS14 are  
334 provided as Supporting Information (files labeled SS14\_TprA\_KO, and SS14\_WT,  
335 respectively). In the SS14\_TprA\_KO file, Kan<sup>R</sup> peptides are labeled PMC\_FU\_2039. These data  
336 demonstrated the expression of the Kan<sup>R</sup> protein in the *tprA*<sup>ko</sup>-SS14 following integration of the  
337 gene. No peptides corresponding to the TprA protein (translated using both the +1/+2 reading  
338 frames to overcome the effect of the frameshift) were found in the *tprA*<sup>ko</sup>- or wt-SS14 samples.  
339  
340  
341  
342  
343  
344  
345  
346  
347  
348  
349  
350  
351  
352  
353  
354  
355



356 **Table 2. Peptides identified by MS on the *tprA*<sup>ko</sup>-SS14 strain matching the Kan<sup>R</sup> protein**  
 357 **sequence.**

| SEQUENCE <sup>1</sup>     | DeltaScore <sup>2</sup> | MH+ [Da] <sup>3</sup> | Theo. MH+ [Da] <sup>3</sup> | ΔM [ppm] <sup>3</sup> | Av. RT (min) <sup>4</sup> |
|---------------------------|-------------------------|-----------------------|-----------------------------|-----------------------|---------------------------|
| LYGKPDAPFLK               | 0.5352                  | 1490.824              | 1490.825                    | -0.58                 | 65.4                      |
| NGWPVEQVWK                | 0.5923                  | 1242.628              | 1242.627                    | 0.84                  | 71.2                      |
| LNSNLDADLYGYR             | 0.7262                  | 1513.729              | 1513.728                    | 0.77                  | 57.1                      |
| TAFQVLEEYPDSGENIVDALAAFLR | 0.4535                  | 2768.379              | 2768.378                    | 0.51                  | 105.1                     |
| LNSNLDADLYGYR             | 0.9097                  | 1513.729              | 1513.728                    | 0.34                  | 64.6                      |
| LLPFSPDSVVTGDFSLDNLIFDEGK | 0.7094                  | 2862.418              | 2862.42                     | -0.41                 | 101.0                     |
| LNWLTAFLPTIK              | 0.7275                  | 1660.913              | 1660.913                    | -0.02                 | 101.0                     |
| YQDLAILWNcLGEFSPSLQK      | 0.6645                  | 2382.181              | 2382.18                     | 0.33                  | 100.9                     |
| TPDDAWLLTTAIPGK           | 0.8178                  | 1598.842              | 1598.842                    | -0.52                 | 101.6                     |
| mNNGLVDASDFDDERNGWPVEQVWK | 0.7833                  | 2937.317              | 2937.311                    | 1.98                  | 83.0                      |
| TPDDAWLLTTAIPGK           | 0.6293                  | 1598.844              | 1598.842                    | 0.84                  | 83.3                      |
| GSVANDVTDEmVR             | 0.8485                  | 1408.637              | 1408.637                    | -0.51                 | 33.5                      |
| DNVGQSGATIYR              | 0.7581                  | 1280.626              | 1280.623                    | 2.12                  | 32.2                      |
| YGIDNPDmNK                | 0.9071                  | 1182.511              | 1182.51                     | 1.05                  | 26.6                      |
| mNNGLVDASDFDDER           | 1                       | 1713.701              | 1713.702                    | -0.67                 | 52.1                      |
| LHSIPVcNcPFNSDR           | 0.7293                  | 1815.827              | 1815.827                    | 0.2                   | 48.4                      |
| RLHSIPVcNcPFNSDR          | 0.6992                  | 1971.927              | 1971.928                    | -0.53                 | 43.5                      |
| LYGKPDAPFLK               | 0.4045                  | 1490.826              | 1490.825                    | 0.5                   | 64.5                      |
| GSVANDVTDEMVR             | 1                       | 1392.643              | 1392.642                    | 0.67                  | 50.0                      |
| RLHSIPVcNcPFNSDR          | 0.6463                  | 1971.929              | 1971.928                    | 0.52                  | 43.3                      |
| LQFHLmLDEFF               | 0.7876                  | 1455.697              | 1455.698                    | -0.4                  | 101.3                     |

358 <sup>1</sup>All peptides were recognized with high confidence, with a false discovery rate set at <0.01

359 <sup>2</sup>Normalized score difference between the currently selected PSM and the highest-scoring PSM  
 360 for this spectrum

361 <sup>3</sup>Experimental mass (MH+), calculated mass of the peptide (Theo MH+), both in Da, and mass  
 362 measurement error (ΔM) in parts per million (ppm).

363 <sup>4</sup>Averaged peptide retention time during chromatographic separation

364

365 **Derivation of a *tprA*<sup>ko</sup>-SS14 pure isolate by limiting dilution and increased antibiotic**  
 366 **pressure.**

367 The *tprA*<sup>ko</sup>-SS14 inactivates kanamycin by expressing an aminoglycoside N6'-

368 acetyltransferase that that catalyzes the conversion of kanamycin to N6'-acetylkanamycin using

369 acetyl-CoA. We reasoned that if enough *tprA*<sup>ko</sup>-SS14 cells were present, they could bring

370 kanamycin concentration below the minimal inhibitory concentration for this antibiotic and  
371 allow growth of wild-type cells. To eliminate the possibility that wt-SS14 *T. pallidum* cells might  
372 survive among the *tprA*<sup>ko</sup>-SS14 cells, we performed serial dilutions of the *tprA*<sup>ko</sup>-SS14 cells and  
373 plated them on multiple wells of a 96-well plate containing Sf1Ep cells. Specifically, wells were  
374 seeded with 3300 and 330 treponemal cells from the *tprA*<sup>ko</sup>-SS14 culture. Additionally, we  
375 increased kanamycin concentration to 200 µg/ml, shown already to be ineffective against the  
376 *tprA*<sup>ko</sup>-SS14 strain (Fig.5A). Although these cultures were passaged every two weeks to allow  
377 treponemal growth, exhausted media was exchanged once a week to ensure Sf1Ep cells viability  
378 and replenish the kanamycin supply. Lack of wt-SS14 cells was assessed by performing ddPCR  
379 targeting the *tprA*, *kan*<sup>R</sup>, and *dnaA* genes as described in the Methods section. Results (Fig.9)  
380 showed that, after two (Fig.9; P1) and four (Fig.9; P2) weeks in culture, no *tprA*-specific signal  
381 could be obtained by ddPCR, supporting complete lack of wild-type strain in the culture wells,  
382 and that in the *tprA*<sup>ko</sup>-SS14 strain, the *kan*<sup>R</sup>:*dnaA* copy number was virtually identical.

383

## 384 **Discussion**

385         Given the significant impact of syphilis on human health, there is great interest in  
386 deepening our understanding of the molecular mechanisms underlying its pathogenesis. In turn,  
387 this could lead to improved strategies for disease control and vaccine development. A critical  
388 step in this direction is the identification of treponemal factors that contribute to virulence. To  
389 date, several experimental approaches have helped syphilis investigators identify and  
390 functionally characterize these factors, such as expression in heterologous hosts (e.g. *Borrelia*  
391 *burgdorferi*, *Treponema denticola*, and *Treponema phagedenis*) [19-21], comparative genomics  
392 [22-26] and, to some extent, gene expression studies and proteomic analysis [15, 25, 27]. Genetic

393 manipulation strategies, however, particularly those that satisfy Koch's molecular postulates [28],  
394 have not been available for *T. pallidum*. The lack of genetic tools was not overly frustrating  
395 because, until 2018 [11, 27], *T. pallidum* could not even be continually propagated *in vitro*.  
396 Understandably, this limitation hindered any attempt aimed at genetically engineering this  
397 pathogen, as antibiotic selection could not readily be performed. In contrast, some *Chlamydia*  
398 species have been propagated *in vitro* since the 1950s, and yet genetic tools for this pathogen  
399 became available only recently [11, 29]. The protocol we devised to make our vector cross the *T.*  
400 *pallidum* envelope was indeed inspired by an early protocol used to introduce DNA into  
401 *Chlamydia* [22, 29]. The use of CaCl<sub>2</sub> was preferred to that of physical methods such as  
402 electroporation simply because the number of treponemal cells yielded by *in vitro* culture is still  
403 very limited compared to other bacteria, including other spirochetes, that have a generation time  
404 significantly shorter than *T. pallidum* and that can be propagated *in vitro* in axenic cultures.  
405 Years ago, before the introduction of the *in vitro* cultivation system for *T. pallidum*, our  
406 laboratory considered an alternative approach to introducing foreign DNA into *T. pallidum*.  
407 Despite *T. pallidum*'s lack of any known plasmids or phage, the mounting evidence that inter-  
408 strain recombination occurs in *T. pallidum* strains and subspecies [22, 23, 30], prompted us to  
409 hypothesize that *T. pallidum* could be competent for transformation. Back then, to test this  
410 hypothesis, we exposed Nichols cells, shortly after harvest from rabbit testes to a construct  
411 similar to the one used here, but with a chloramphenicol resistance (instead of *kan*<sup>R</sup>) gene under  
412 control of the *tp0574* promoter, between *tpmA* homology arms. The construct also contained  
413 several DNA uptake sequences (DUSs) [31] from both Gram-positive and Gram-negative  
414 bacteria to facilitate uptake by a putative surface receptor/internalization machinery that was  
415 predicted *in silico* in *T. pallidum* based on comparative genomics. Following exposure to the

416 construct, treponemes were re-injected into a naïve animal's testes, and selection was attempted  
417 *in vivo* by treating the animal with chloramphenicol. Although these previous experiments failed  
418 to provide evidence that genetically modified treponemes could be obtained, as treponemes  
419 could be not retrieved from the infected animal despite seroconversion, the hypothesis that *T.*  
420 *pallidum* could naturally uptake DNA from the environment and integrate it into its genome can  
421 now be explored again, to help explain inter-strain recombination events.

422         New and far more exciting future directions include the development of shuttle plasmids  
423 that do not need to integrate into the *T. pallidum* genome but are suitable to express *T. pallidum*  
424 ORFs for complementation purposes, for example, but also to express fluorescent reporter  
425 proteins such as GFP, CFP, mCherry, or reporter enzymes such as  $\beta$ -galactosidase, with the  
426 overall goal of better understanding gene regulation. Expression of luciferase enzymes for *in vivo*  
427 imaging, as done for other spirochetes [20, 30], could also be desirable. The transformation of *T.*  
428 *pallidum* strains with shuttle plasmids should not be complicated by the presence of native  
429 plasmids like it is in some *Chlamydia* species. Plasmids carrying the same origin of replication  
430 are generally incompatible and tend not to coexist in a cell. Therefore, the maintenance of a  
431 native plasmid limits the introduction of exogenous ones [20, 32]. The absence of endogenous  
432 plasmids in *T. pallidum* should eliminate the issue of competition for plasmid replication factors  
433 that could hinder the transformation efficiencies of exogenous recombinant plasmids.

434         Also, the development of a conditional expression vector for proteins or miRNA for RNA  
435 silencing and post-transcriptional regulation would be highly beneficial. Our first attempt to  
436 knock out the *tprK* gene (*tp0897*) of *T. pallidum* was conducted in parallel to the experiments  
437 described in this manuscript. We were, however, unsuccessful in obtaining a *tprK*<sup>ko</sup> strain. TprK  
438 is a *T. pallidum* outer membrane protein (OMP) that undergoes extensive intra-strain antigenic

439 variation through non-reciprocal gene conversion and is one of the virulence factors primarily  
440 responsible for *T. pallidum* immune evasion during infection [32-35]. Despite the extensive  
441 recombination events that affect the gene ORF, *tprK* gene variants with frameshift mutations or  
442 stop codons were never reported, even when deep sequencing was performed on this gene. This  
443 could suggest that *T. pallidum* cells with a non-functional TprK are not viable and is consistent  
444 with the spirochete's need to generate extreme diversity in this gene rather than simply deleting  
445 it. Regarding our experiment to replace *tprK* with a *kan<sup>R</sup>* cassette, we might simply have been  
446 unsuccessful. However, if a *tprK<sup>ko</sup>* strain were not viable, a conditional expression system could  
447 circumvent the problem and be useful to understand what biological function the TprK protein  
448 variants mediate in addition to immune evasion that makes it essential for this pathogen. In the  
449 specific case of TprK, however, current work is aiming at deleting the source of *tprK* variability,  
450 namely the donor cassettes that recombine into the gene expression site. This should generate  
451 treponemes with an impaired recombination system that can only express a single TprK variant,  
452 hence incapable of immune escape. Along the same line, the inactivation of many genes might  
453 be problematic in the syphilis spirochete, because the small size of treponemal genomes suggests  
454 that the genes that escaped evolutionary genomic reduction might be essential. In this scenario,  
455 inducible systems for gene silencing or ablation would be helpful. Today, site-directed  
456 recombination technologies are increasingly used to manipulate an organism's DNA under  
457 controlled conditions *in vivo*. One example is the system analogous to Cre-Lox recombination  
458 but involves the recombination of sequences between short flippase recognition target (FRT)  
459 sites by the recombinase flippase (Flp). An FRT-Flp recombination system would allow *in vivo*  
460 gene ablation if FRT could be introduced upstream and downstream of a locus. Expression in  
461 *trans* of the Flp recombinase would then induce excision of the sequence between the FRTs. In

462 addition, an inducible expression system would be beneficial for epigenetic gene silencing  
463 approaches, such as the CRISPR/Cas9 system and TALENS [35-38]. All these approaches,  
464 however, will require some adjustments to the biology of *T. pallidum*, whose genome has a very  
465 high GC content (~56%), and certain genes expressing ectopic proteins such as recombinases  
466 will need to be optimized for expression in this spirochete. A different direction could take  
467 advantage of transgenic expression to increase the amount of OMPs in *T. pallidum* envelope in a  
468 *tprK*-impaired mutant. This approach could lead to a strain that could be used to create outer-  
469 membrane vesicles rich in protective OMPs to be used for immunization purposes.

470         The result that the ratio between the *kan<sup>R</sup>* gene and *tp0574* was higher than originally  
471 expected was intriguing and worth discussing in the context perhaps of molecular detection  
472 assays for *T. pallidum*. Following the sequencing of the Nichols strain genome, *T. pallidum oriC*  
473 was localized at nucleotide +1 [39] based on gene synteny. Replication of the bacterial  
474 chromosome is initiated at a single *oriC* region and proceeds in both directions. During growth,  
475 replication is generally initiated once per cell cycle, however, under optimal nutrient and media  
476 conditions, another round of replication can be initiated even before the previous round has  
477 completed, resulting in the inheritance by daughter cells of partially replicated chromosomes [18,  
478 40, 41]. Partial replication of a chromosome can create an unbalanced ratio between genes that  
479 are near *oriC* (such as *kan<sup>R</sup>*, in our case) that are already duplicated, and genes farther away from  
480 *oriC* that are still in single copy (such as *tp0574*, located at the polar opposite of the *kan<sup>R</sup>* gene in  
481 the ~1Mb *T. pallidum* chromosome, and therefore one of the last genes to replicate). Hence,  
482 during active cell growth, the ratio between copies of genes close to *oriC* and more distant ones  
483 can be remarkably above 1. As mentioned, the >1 ratio *kan<sup>R</sup>:tp0574* in *tprA<sup>ko</sup>*-SS14 grown in  
484 culture likely reflects partial replication of some chromosomes during propagation. This could

485 support that genes located near the origin of replication could be better targets for *T. pallidum*  
486 detection in clinical samples, but perhaps that genes located further away from the origin could  
487 be more suitable to estimate the actual number of treponemal cells in a sample.

488 Ongoing work in the laboratory is focusing also on analyzing the transcriptional and  
489 proteome profile of the *tprA*<sup>ko</sup>-SS14 strain compared to the wild-type. It is intriguing that, based  
490 on our *in vitro* cultivation results, the *tprA*<sup>ko</sup>-SS14 strain grew significantly faster than the wild-  
491 type strain. This difference was not due to errors in the initial inoculum, as the experiment  
492 reported in Fig.3 was repeated twice independently and the results were not different. The ability  
493 of the transformed strain to proliferate faster was also suggested by the fact that the rabbit  
494 infected with the *tprA*<sup>ko</sup>-SS14 strain developed orchitis earlier than the untreated control, even  
495 though the inoculum was the same. However, the *in vivo* experiments are not conclusive in this  
496 regard, as only one rabbit was used as untreated control, and the later development of orchitis  
497 could simply be due to rabbit-to-rabbit variability. It is nonetheless possible that ablating the  
498 *tprA* pseudogene might have conferred a selective advantage and have reduced the metabolic  
499 burden of expressing a gene that is not functional. Previous studies carried on in our laboratory  
500 with *T. pallidum* strains carrying a frame-shifted *tprA* gene (although not with the SS14 strain),  
501 showed that *tprA* is transcribed in these strains, although at a very low level [16].

502 Additional experiments to be performed include repeating the transformation experiment  
503 reported here, as well as targeting other *T. pallidum* genes that, unlike *tprA*, will provide us with  
504 the ability to study a phenotype. As proteins mediating motility, antigenic variation, and  
505 adhesions are main virulence factors of spirochetes, our attention will focus next on ablating  
506 expression of the endoflagella and evaluate whether a non-motile *T. pallidum* can successfully

507 establish an infection in the rabbit host, on eliminating the *tprK* donor sites to impair antigenic  
508 variation and immune evasion, and knock-out adhesins.

509

## 510 **Conclusions**

511 We demonstrate that genetic engineering of the syphilis spirochete is possible with a  
512 relatively simple method that has the potential to “transform” our way to approach the study of  
513 *T. pallidum* biology and syphilis pathogenesis.

514

## 515 **Materials and Methods**

### 516 **Ethics statement**

517 Only male NZW rabbits (*Oryctolagus cuniculus*) ranging from 3.5-4.5 kg in weight were  
518 used in this study. Specific pathogen-free (SPF; *Pasteurella multocida*, and *Treponema*  
519 *paraluiscuniculi*) animals were purchased from Western Oregon Rabbit Company (Philomath,  
520 OR) and housed at the University of Washington (UW) Animal Research and Care Facility  
521 (ARCF). Care was provided in accordance with the procedures described in the Guide for the  
522 Care and Use of Laboratory Animals [42] under protocols approved by the UW Institutional  
523 Animal Care and Use Committee (IACUC; Protocol # 4243-01, PI: Lorenzo Giacani). Upon  
524 arrival and before use, all rabbits were bled and tested with a treponemal test (TPPA; Fujirebio,  
525 Tokyo, Japan) and a non-treponemal test (VDRL; Becton Dickinson, Franklin Lakes, NJ) to  
526 confirm lack of immunity due to infection with *Treponema paraluiscuniculi*, given that animals  
527 are tested randomly by the provider. Both tests were performed according to the manufacturer`s  
528 instructions. Only seronegative rabbits were used for experimental infection with transformed



529 and wild-type treponemes (see paragraph below for rabbit infection, treatment and sample  
530 collection).

531

### 532 **Plasmid construct**

533 The pUC57 vector (2,710 bp; Genscript, Piscataway, NJ) was engineered to carry the *kan<sup>R</sup>* gene  
534 downstream of the *T. pallidum tp0574* gene promoter and ribosomal binding site. Appropriate spacing (8  
535 nt) was ensured between the RBS and the *kan<sup>R</sup>* gene start codon in the construct. Upstream and  
536 downstream of the *tp0574*prom-*kan<sup>R</sup>* hybrid sequence, respectively, two homology arms corresponding  
537 to the regions flanking the *tprA* gene were inserted. The upstream arm was 998 bp in length and  
538 corresponded to position 7,343-8,340 of the wt-SS14 strain genome (NC021508.1/ CP004011.1). The  
539 downstream arm was 999 bp, and encompassed position 10,165-11,163 of the SS14 genome. The  
540 construct was cloned between the XheI and BamHI sites of the pUC57 vector, in opposite orientation  
541 compared to the *lac* promoter that is upstream of the polylinker. Prior to use, the insert underwent  
542 Sanger sequencing to ensure sequence accuracy. The sequence of the insert is provided in File S1. This  
543 construct was named *ptprAarms-tp0574prom-kan<sup>R</sup>*. Primers annealing a) to the vector only, b) within the  
544 cloned insert, and c) upstream of the *tprA* homology arms in the *T. pallidum* genome are reported in  
545 Table 1. The pUC57 vector carries an ampicillin resistance gene (*bla*) for selection in *E. coli*. Because  
546 penicillin is the first-line antibiotic to cure syphilis, we first evaluated whether the sequences flanking  
547 the *bla* gene of the pUC57 vector could have had sufficient homology to *T. pallidum* DNA to induce  
548 recombination and integration of the *bla* gene in the genome, but no homology was found upon BLAST  
549 analysis of these regions against the SS14 or other syphilis strain genomes. Regarding the insertion of a  
550 *kan<sup>R</sup>* gene in the *T. pallidum* genome, the CDC STI treatment guidelines do not recommend the use of  
551 kanamycin for syphilis therapy, hence a kanamycin-resistant syphilis strain does not pose a risk in case

552 of unlikely exposure. To obtain a highly concentrated, endotoxin-free plasmid preparation, the  
553 *ptprAarms-tp0574prom-kan<sup>R</sup>* was transformed into TOP10 *E. coli* cells (Thermo Fisher, Waltham, MA),  
554 which were then grown first in a 5-ml starter culture overnight, and then in 500 ml of LB media  
555 supplemented with 100 µg/ml of ampicillin at 37°C. The plasmid was purified using the Endo-Free  
556 Plasmid Mega Kit (Qiagen, Germantown, MD) according to the manufacturer's instructions. Following  
557 purification, plasmid concentration was assessed using an ND-1000 spectrophotometer (Nanodrop  
558 Technologies, Wilmington, NC). The vector was then divided into 50 µl aliquots and stored at -80 until  
559 use.

560

#### 561 **Source of *T. pallidum* for *in vitro* cultivation, transformation, and selection**

562 The SS14 strain of *T. pallidum* used for *in vitro* propagation was obtained from a frozen  
563 stock previously propagated IT in NZW rabbits as already reported [43]. This strain was  
564 originally isolated in 1977 in Atlanta (USA) from a penicillin-allergic patient with secondary  
565 syphilis who did not respond to therapy with macrolides. *In vitro* culturing was performed  
566 according to Edmondson *et al.* [11] in the wells of a 24-well plate initially, and then expanded in  
567 a 6-well culture plate (Corning Inc, Corning, NY). The microaerophilic atmosphere (MA; 1.5%  
568 O<sub>2</sub>, 3.5% CO<sub>2</sub>, and 95% N<sub>2</sub>) necessary to sustain treponemal viability was achieved using a  
569 Heracell VIOS 160i tri-gas incubator (Thermo Fisher). Before the addition of the treponemal  
570 cells, Sf1Ep cells were incubated in a 5% CO<sub>2</sub> atmosphere in a HeraCell 150 incubator (Thermo  
571 Fisher). For transformation, treponemes were first sub-cultured into the wells of a 24-well plate  
572 as per protocol [11]. Briefly, the day before treponemal inoculation, a 24-well plate was seeded  
573 with 2x10<sup>4</sup> rabbit Sf1Ep cells/well in 2.5 ml of culture media. The plates were then incubated  
574 overnight in the HeraCell incubator. On the same day, TpCM-2 media was prepared according to

575 protocol and equilibrated overnight at 34°C in the MA incubator. The following day, cell culture  
576 media was removed from the 24-well plate, and cells were rinsed with equilibrated TpCM-2  
577 media. Subsequently, each well was filled with 2.5 ml of equilibrated TpCM-2 media, and the  
578 plate was transferred to the MA incubator. To prepare the treponemal inoculum, the Sf1Ep cells  
579 seeded the previous week with wt-SS14 cells were trypsinized to allow the release and  
580 enumeration of spirochetes using the DFM. A total of 2-3x10<sup>8</sup> treponemes were inoculated 24  
581 hours after plating the Sf1Ep. Following treponemal addition, the total volume of media in each  
582 well was brought to 2.5 ml. Two days following treponemal cell addition, the plate was removed  
583 from the MA incubator, and 1 ml of old media was replaced with fresh one. Four days after  
584 treponemal cell inoculation, the plate was removed again from the MA incubator and the culture  
585 media was eliminated gently not to disturb Sf1Ep cells and adherent treponemes and replaced by  
586 500 µl of transformation buffer (50 mM CaCl<sub>2</sub>, 10 mM Tris pH 7.4; equilibrated in MA)  
587 containing 15 µg total of *ptprAarms-47p-kan<sup>R</sup>*. As a control, to rule out CaCl<sub>2</sub> toxicity to  
588 treponema cells, treponemes were also incubated with transformation buffer without plasmid  
589 vector. Cells were incubated in these transformation buffers (with and without plasmid) for 10  
590 min at 34°C in the MA incubator and then washed twice with equilibrated TpCM-2 media to  
591 remove free plasmid from the culture wells. Finally, 2.5 ml of fresh TpCM-2 equilibrated in MA  
592 were added to the wells, and plates were returned to the MA incubator. The following day,  
593 concentrated tissue-culture grade liquid kanamycin sulfate (Sigma-Aldrich, St. Louis, MO) was  
594 added to the appropriate wells to reach a final concentration of 25 µg/ml. As a control, to  
595 confirm the treponemicidal activity of kanamycin, wild-type treponemes were also incubated in  
596 fresh TpCM-2 media containing 25 µg/ml of kanamycin sulfate. Kanamycin sulfate-containing  
597 TpCM-2 media was exchanged weekly but treponemes were sub-cultured every two weeks as

598 per published protocol [11] until they reached a density of  $\sim 3 \times 10^7$  cells/ml, counted using the  
599 DFM, at which point they were sub-cultured first into one well of a 6-well plate (seeded with  $10^5$   
600 Sf1Ep cells on the previous day) to upscale the culture, and then into all the wells of a 6-well  
601 plate at the following passage to further expand the strain and minimize the chances of culture  
602 loss due to contamination. Whenever possible, treponemes that were not used for inoculation of a  
603 new plate were pelleted by centrifugation at 15,000 rpm for 10 min using a tabletop centrifuge  
604 and resuspended in 1X DNA lysis buffer (10 mM Tris-HCl, 0.1 M EDTA, 0.5% SDS), Trizol  
605 (Thermo Fisher), or used to make glycerol stocks, regardless of the number of treponemes  
606 counted by DFM.

607 To compare susceptibility to kanamycin of the *tprA*<sup>ko</sup>-SS14 and wild-type strains,  
608 treponemes obtained from the tenth *in vitro* passage were sub-cultured into two 96-well cell  
609 culture plates (Corning) instead of 6-well plates to allow a total of eight replicates for each  
610 kanamycin sulfate concentration tested. Briefly, the day before inoculation, two 96-well plates  
611 were seeded with  $3 \times 10^3$  rabbit Sf1Ep cells per well in 150  $\mu$ l of culture media. The plates were  
612 then incubated overnight in the HeraCell incubator. On the same day, TpCM-2 media was  
613 prepared according to protocol and equilibrated overnight at 34°C in the MA incubator. On the  
614 following day, cell culture media was removed from the 96-well plates, and cells were rinsed  
615 with equilibrated TpCM-2 media. Subsequently, each well was filled with 150  $\mu$ l of equilibrated  
616 TpCM-2 media, and the plate was transferred to the MA incubator. To prepare the treponemal  
617 inoculum for the 96-well plates, the Sf1Ep cells seeded the previous week with either the *tprA*<sup>ko</sup>-  
618 SS14 and wild-type strains were trypsinized to allow the release and enumeration of spirochetes.  
619 Treponemes were counted using the DFM and diluted in TpCM-2 to  $3.3 \times 10^5$  *T. pallidum* cells/ml  
620 to obtain a treponemal inoculum of  $5 \times 10^4$  cells in a total of 150  $\mu$ l, which were then added to

621 each well of the 96-well plates. The kanamycin sulfate concentrations tested were a 1:2 dilution  
622 series ranging from 200 to 1.6 µg/ml, for a total of 8 different concentrations tested in eight  
623 replicate wells. No-antibiotic wells, as well as solvent-only wells (water), were also included as  
624 controls. Tissue-culture grade kanamycin sulfate was purchased from Sigma-Aldrich. Wild-type  
625 and *tprA*<sup>ko</sup>-SS14 treponemes in no-antibiotic wells were harvested at day 0 (inoculum), day 1,  
626 day 4, and day 7 post-inoculation after incubation at 34°C in the MA incubator to assess  
627 treponemal growth in normal conditions and that, even in absence of antibiotic pressure, the *kan*<sup>R</sup>  
628 gene would remain steadily integrated in place of the *tprA* pseudogene in the *tprA*<sup>ko</sup>-SS14  
629 treponemes. The experiment where *tprA*<sup>ko</sup>-SS14 treponemes were grown in a 96-well plate in the  
630 presence or absence of kanamycin sulfate was performed twice to ensure a) the reproducibility,  
631 and b) to obtain DNA-free RNA to compare the level of transcription of the *kan*<sup>R</sup> gene and that  
632 of the *tp574* genes by RT-ddPCR.

633 Treponemes harvested at passage #15 (Week 20 post-transformation) were resuspended  
634 in SDS-PAGE sample buffer and proteins were separated on a 12% pre-made acrylamide gel  
635 (Thermo Fisher) to evaluate the expression of the Kan<sup>R</sup> protein using mass spectrometry after gel  
636 band excision and digestion (see protocol below).

637

### 638 **Rabbit infection, treatment, and sample collection**

639 Pharmaceutical grade kanamycin sulfate (50 mg/ml in water) was prepared by Kelley-  
640 Ross compounding pharmacy in Seattle, WA, and stored at -20°C until use according to the  
641 pharmacist's instructions. Once thawed, the bottle was kept at 4°C and removed from the fridge  
642 only to withdraw doses. On the day of infection, *tprA*<sup>ko</sup>-SS14 and wild-type strains were  
643 harvested from the wells of a 6-well culture plate, enumerated using a Nikon NiU darkfield

644 microscope (Nikon, Melville, NY), and diluted in sterile saline to  $3 \times 10^7$ /ml. Three NZW rabbits  
645 were infected. One rabbit was infected IT only in its left testicle with the *tprA*<sup>ko</sup>-SS14 strain. This  
646 rabbit received the first subcutaneous dose of kanamycin sulfate (5.0 mg/Kg) one hour before  
647 infection and was treated every 12 hours for a total of 10 days, each time with the same dose.  
648 The second rabbit was infected with the wt-SS14 strain and also treated with kanamycin as  
649 above, while the third rabbit was infected with wt-SS14 but not treated. When orchitis  
650 developed, rabbits were euthanized, and the left testicle was removed and minced in sterile saline  
651 to extract treponemes. The control rabbit infected with the wt-SS14 strain and treated with  
652 kanamycin was euthanized when the other control rabbits developed orchitis, and testicular  
653 extracts were also processed. Treponemal suspensions were spun at 1,000 rpm at 4°C in an  
654 Eppendorf 5430R refrigerated centrifuge, and cellular debris were discarded. Treponemes in the  
655 supernate were enumerated by DFM and resuspended in 1X DNA lysis buffer by mixing equal  
656 volume of extract and 2X buffer. The remaining treponemes were frozen in glycerol stocks (50%  
657 serum-saline + 50% sterile glycerol). Terminal bleeding through cardiac puncture was performed  
658 to obtain serum for VDRL and TPPA tests, performed as described above. All sera were heat-  
659 inactivated at 56°C for 30 min before use.

660

#### 661 **DNA and RNA extraction**

662 DNA extraction from cultured *tprA*<sup>ko</sup>-SS14 or wild-type strains propagated in 6-well  
663 plates following the transformation procedure was performed using the QIAamp mini kit  
664 (Qiagen) according to the manufacturer's instructions. Extracted DNA was stored at -80°C until  
665 use for qualitative PCR, ddPCR, or WGS (see below). DNA extraction from the 96-well culture  
666 plates used to assess susceptibility to kanamycin of the *tprA*<sup>ko</sup>-SS14 and wild-type strain,

667 respectively, was performed after a one-week incubation of the cells in the MA incubator. Plate  
668 culture media was removed with a vacuum manifold from each well and discarded. Cells were  
669 not trypsinized but 200  $\mu$ l of Genomic Lysis Buffer (Zymo Research, Irvine, CA) for DNA  
670 extraction was added. Cells were then lysed through incubation in lysis buffer for 30 min at room  
671 temperature as per provided protocol. While propagating the SS14 strain, we used dark-field  
672 enumeration of treponemes present in the cell culture supernate and attached to Sf1Ep cells but  
673 released by cell trypsinization, and determined that the majority (~85%) of *T. pallidum* cells *in*  
674 *vitro* adhere to the rabbit epithelial cell monolayer, similar to what was reported by Edmondson  
675 *et al.* for other cultivated strains [11]. This evidence allowed us to discard the culture media  
676 without concern that the experimental results would be significantly affected. Following cell  
677 lysis, the plates were frozen at -20°C until extraction could be completed. To purify DNA, the  
678 96-well plates were thawed at 56°C in a dry incubator and quickly spun to recuperate  
679 condensation drops on the well lids. DNA was extracted using a Quick-DNA 96 kit (Zymo  
680 Research) according to the manufacturer's protocol. DNA was eluted in 100  $\mu$ l of water and  
681 stored at -20°C until amplification using qPCR to evaluate treponemal burden. The same  
682 samples were used to perform ddPCR (see protocol below) targeting *tp0001* (*dnaA*), *tpmA*, and  
683 the *kan<sup>R</sup>* genes to investigate the ratio between these targets. As an additional control, extracted  
684 samples were also tested randomly using pUC57-specific primers (Table 1) annealing upstream  
685 and downstream of the cloned insert to assess carry-over of the plasmid used for transformation.

686 RNA extraction was performed using the Quick-RNA 96 kit (Zymo Research) following  
687 the manufacturer's instructions with the exception that in-column DNA digestion using the  
688 DNaseI enzyme (provided by the kit) was prolonged for a total of 1 hour and performed using  
689 50% more enzyme than normally suggested. Single samples from *in vivo* and *in vitro*

690 propagation were instead extracted according to the Trizol reagent manual. Total RNA was  
691 treated with DNaseI according to the protocol provided with the TURBO DNA-free kit (Thermo  
692 Fisher). DNA-free RNA was checked for residual DNA contamination by qualitative  
693 amplification using primers specific for the *tp0574* gene (primers in Table 1) as already  
694 described [44]. Reverse transcription (RT) of total RNA was performed using the High-Capacity  
695 cDNA Reverse Transcription kit (Thermo Fisher) with random hexamers according to the  
696 provided protocol. cDNA samples were stored at -80°C until use for qualitative PCR to  
697 demonstrate expression of the *kan<sup>R</sup>* gene or for ddPCR to quantify the level of expression of the  
698 *tp0574* and the *kan<sup>R</sup>* genes (primers in Table 1).

699

## 700 **Qualitative and quantitative PCR**

701 Samples harvested during routine propagation of the *tprA<sup>ko</sup>*-SS14 and wild-type strains  
702 were assessed for integration of the *kan<sup>R</sup>* gene into the *tprA* locus by using qualitative PCR. In  
703 the first amplification, the sense primer targeted a region of the *T. pallidum* genome immediately  
704 upstream of the left *tprA* homology arm of the vector (and hence not cloned into *ptprA*arms-  
705 *tp0574*prom-*kan<sup>R</sup>*), while the antisense primers targeted the *kan<sup>R</sup>* gene, with the rationale that  
706 only a *kan<sup>R</sup>* gene integrated into the *tprA* locus would provide amplification. Primers and  
707 amplicon size are reported in Table 1 and schematically represented in Fig.2, along with the  
708 results of the PCR done on DNA extracted from treponemes at Passage #7. In the second PCR,  
709 the sense primer targeted the *kan<sup>R</sup>* gene, and the antisense primer (Table 1) targeted the genomic  
710 region downstream of the left *tprA* homology arm of the vector. Amplification of the *tp0574*  
711 gene was used as positive amplification control. Amplifications were performed using five  
712 microliters of extracted DNA in 50 µl final volume containing 2.5 units of GoTaq polymerase



713 (Promega, Madison, WI), 200  $\mu$ M of each dNTP, 1.5 mM of MgCl<sub>2</sub>, and 400 nM of sense and  
714 antisense primers. Cycling parameters were initial denaturation (94°C) and final extension  
715 (72°C) for 10 min each. Denaturation (94°C) and annealing (60°C) steps were carried on for 1  
716 min each, while the extension step (72°C) was carried out for 1 or 2 min depending on amplicon  
717 length. A total of 40 cycles were performed in each amplification. A qPCR assay was instead  
718 used to quantify treponemal burden in samples extracted from the 96-well plate following the  
719 kanamycin susceptibility assay of the *tprA*<sup>ko</sup>-SS14 and wild-type strains. In this case, the  
720 treponemal burden was evaluated using a qPCR approach targeting the *tp0574* gene previously  
721 described [16]. Primers are reported in Table 1. Briefly, an absolute quantification protocol using  
722 an external standard was used to quantify the *tp0574* gene copy number at the time of sample  
723 harvest. Standard construction was also previously described in detail [16]. For amplification, the  
724 Powerup SYBR Green Master Mix (Thermo Fisher) was used. Amplifications were run on a  
725 QuantStudio 5 thermal cycler (Thermo Fisher) and results were analyzed using the instrument  
726 software. Data were imported into Prism 8 (GraphPad Software, San Diego, CA) and further  
727 analyzed to assess statistical significance of the values from test and no-antibiotic control groups  
728 using one-way ANOVA with the Dunnett test for correction of multiple comparisons or t-test,  
729 with significance set at  $p < 0.05$  in both cases.

730

### 731 **Droplet digital PCR (ddPCR)**

732 Droplet digital PCR assays were conducted to assess the ratio between the number of  
733 copies of the *kan*<sup>R</sup> gene and another target on *T. pallidum* genome in the *tprA*<sup>ko</sup>-SS14 strain, in  
734 this case, the *tp0574* gene, the *tp0001* gene (*dnaA*), or the *tprA* gene. The *tp0574* and *dnaA*  
735 targets were chosen because of their relative distance to the *kan*<sup>R</sup> insertion site (< 10 Kbp from

736 *dnaA*, and ~513Kbp from the *tp0574* gene) to account for possible discrepancies due to the  
737 vicinity of the *kan<sup>R</sup>* gene to *T. pallidum* chromosomal origin of replication. ddPCR was also used  
738 to evaluate the level of transcription of the *kan<sup>R</sup>* gene and the *tp0574* gene, as both genes are  
739 transcribed by the same promoter. Amplification of the *tprA* gene was used as control. To this  
740 end, four sets of primers/probes (Table1) were designed. DNA obtained from the 96-well plate  
741 used to perform the kanamycin susceptibility assay with the *tprA<sup>ko</sup>*-SS14 strain was used along  
742 with the DNA from the *tprA<sup>ko</sup>*-SS14 strain obtained from Passage #8, and DNA extracted from  
743 the *tprA<sup>ko</sup>*-SS14 and SS14 wild-type treponemes propagated *in vivo*. cDNA was obtained (as  
744 described above) from the 96-well plate used to perform the kanamycin susceptibility assay with  
745 the *tprA<sup>ko</sup>*-SS14 strain, and from the *tprA<sup>ko</sup>*-SS14 and SS14 wild-type treponemes propagated *in*  
746 *vivo* and *in vitro* (Passage #8).

747 ddPCR was performed on a Bio-Rad QX100 system (Bio-Rad, Carlsbad, CA). Each  
748 reaction was performed using ddPCR Supermix for Probes (Bio-Rad) with the final  
749 concentration of primers at 900 nM and probes at 250 nM in a total reaction volume of 25  $\mu$ l.  
750 Before amplification, template DNA was digested with 25 units of EcoRI (New England  
751 Biolabs, Ipswich, MA). cDNA was used without the digestion step. After droplet generation,  
752 droplets were transferred to a 96-well PCR plate and amplified on a 2720 Thermal Cycler  
753 (Thermo Fisher) with the following cycling parameters: 94°C for 10 min, followed by 40 cycles  
754 of 94°C for 30 s and 60°C for 1 min, and 98°C hold for 10 min. After amplification, the plate  
755 was transferred to QX200 droplet reader (Bio-Rad). Results were analyzed using the QuantaSoft  
756 software (Bio-Rad).

757

758

759

## 760 **Analysis of Kan<sup>R</sup> expression by mass spectrometry**

761 Expression of the KanR protein (molecular weight of 31.1 KDa) was assessed by liquid  
762 chromatography-mass spectrometry (LC-MS) in *tprA*<sup>ko</sup>-SS14 and wild-type treponemes. For the  
763 SDS PAGE, the *tprA*<sup>ko</sup>-SS14 and wild-type treponemes were harvested as described above from  
764 culture plates (Passage 15, Week 20 post-transformation), counted by DFM, and centrifuged at  
765 100xg (1,000 rpm in a tabletop centrifuge with a 9 cm radius) to remove residual Sf1Ep cells. The  
766 resulting supernate was then spun at 15,000 rpm at RT for 10 min to pellet treponemes and  
767 pelletresuspend in 1X SDS-PAGE sample buffer (50 mM Tris-HCl; 100 mM DTT; 70 mM SDS;  
768 1.5 mM Bromophenol blue, 2M glycerol). Approximately 10<sup>9</sup> treponemes were resuspended in a  
769 final volume of 200 µl of SDS-PAGE sample buffer. Samples were boiled and loaded onto a 12%  
770 precast Tris-Tricine gel in a mini-Protean apparatus (both from Bio-Rad, Hercules, CA). Gels  
771 were stained using SimplyBlue SafeStain (Thermo Fisher). Subsequently, a gel segment  
772 encompassing protein sizes between 20-40 kDa (and thus including the ~30 kDa Kan<sup>R</sup> protein)  
773 was excised and bands were subjected to overnight in-gel trypsin digestion as previously  
774 described [16, 24]. The volume of digestion products was reduced to approximately 10 µl using a  
775 speed-vac. Peptides were analyzed by LC-MS at the Fred Hutchinson Cancer Research Center  
776 proteomics facility using an LTQ HP1100 mass spectrometer (Thermo Fisher), results were  
777 analyzed using the Proteome Discoverer software. Identified peptides were filtered to a false  
778 discovery rate (FDR) of <0.01 to ensure high confidence in the identified peptides.

779

## 780 **Whole-genome sequencing**

781 Whole-genome sequencing was performed following DNA extraction of *tprA*<sup>ko</sup>-SS14 and  
782 wild-type treponemes cultured *in vitro* (Passage #9; Fig.1). Pre-capture libraries were prepared  
783 from up to 100 ng input DNA using the KAPA Hyperplus kit (Roche) and TruSeq adapters and  
784 barcoded primers (Illumina), following the manufacturer's protocols, yielding an average  
785 fragment size longer than 500 bp. Hybrid capture of *T. pallidum* genomic DNA was performed  
786 overnight (>16 hours) using a custom IDT xGen panel designed against the reference genome  
787 NC\_010741, following the manufacturer's protocol. Short-read sequencing was performed on  
788 an Illumina MiSeq with 192 bp single-end reads, yielding at least 1e6 reads per sample. Reads  
789 were adapter and quality trimmed using Trimmomatic v0.39 [45] and assembled to the TPA  
790 reference genome NC\_021508.1, or NC\_021508.1 with the *tprA* gene replaced by the kanamycin  
791 cassette, using Bowtie2 [46], to an average coverage exceeding 175x across the genome for all  
792 samples. Manual confirmation of expected coverage and junctions was performed by visual  
793 inspection in Geneious Prime v2020.1.2 [47].

794

795 **Derivation of a *tprA*<sup>ko</sup>-SS14 pure isolate by limiting dilution and increased antibiotic**  
796 **selective pressure**

797 Sf1Ep cells were seeded into the wells of a 96-well culture plate at a density of 3,000  
798 cells/well in 150 µl of MEM and cultured overnight in a 37°C in the 5% CO<sub>2</sub> incubator. The next  
799 morning after the cells had adhered to the plate the MEM was exchanged for 135 µl TpCM2  
800 media which had been equilibrated overnight in a 34°C in the MA incubator. The cells were  
801 equilibrated in the MA incubator for at least 3 hr before proceeding to inoculation of the *tprA*<sup>ko</sup>-  
802 SS14 cells, harvested using trypsinization from a 6-well plate where the strain was routinely  
803 propagated. Following harvest, cell concentration was determined by DFM. For the serial

804 dilutions,  $3.3 \times 10^4$  *tprA*<sup>ko</sup>-SS14 cells were inoculated into each of 8 wells of the prepared 96-well  
805 plate, mixed thoroughly, and then 15  $\mu$ l of the diluted *T. pallidum* mixture moved to the next set  
806 of 8 wells. In this manner, successive 1:10 dilutions of *tprA*<sup>ko</sup>-SS14 were made on the plate until  
807 the mixture was diluted to 0.33 *tprA*<sup>ko</sup>-SS14 cells/well. Kanamycin was added to each well for a  
808 final concentration of 200ug/ml. The plate was grown for 2 weeks in the MA incubator, with a  
809 half-media change at one week. After 2 weeks, the supernatant was removed from the plate, the  
810 wells washed briefly with 20ul of trypsin, and then incubated with 20ul of trypsin for 5min at  
811 37°C to release adherent *T. pallidum* cells. Ten microliters of the resulting *T. pallidum* mixture  
812 were inoculated into a fresh 96-well plate prepared and incubated as described above. To the  
813 remaining 10  $\mu$ l, 200  $\mu$ l of genomic lysis buffer from a Quick-DNA 96 kit (Zymo Research,  
814 Irvine, CA) was added. The plate was sealed and stored at -20°C until DNA extraction. DNA  
815 was extracted using the Quick-DNA 96 kit (Zymo Research). DNA was eluted in 30  $\mu$ l of  
816 molecular H<sub>2</sub>O, the minimum volume recommended for the kit. Lack of amplification signal for  
817 *tprA* was assessed by ddPCR as described above.

818

## 819 **Acknowledgments**

820 This work was supported by the National Institute for Allergy and Infectious Diseases of  
821 the National Institutes of Health grant number U19AI144133 (Project 2 and Genomics and  
822 Isolation Core; Project 2 leader: L.G.; Core leaders: L.G. and A.G.; PI: Anna Wald, University of  
823 Washington). We are grateful to Dr. Philip Stewart, Ph.D. (NIH Rocky Mountain Laboratory,  
824 Hamilton, MT) and Mark C. Fernandez, Ph.D. candidate (University of Washington, Department  
825 of Global Health) for helpful suggestions on the experimental design. The senior author, Lorenzo  
826 Giacani, wishes to dedicate this milestone achievement in the field to Dr. Arturo Centurion-Lara,

827 MD, mentor and friend, who prematurely passed away in 2018. The content of this study is  
828 solely the responsibility of the authors and does not necessarily represent the official views of the  
829 National Institutes of Health. The funders had no role in study design, data collection, and  
830 analysis, decision to publish, or preparation of the manuscript.

831

## 832 **References**

- 833 1. WHO. Prevalence and incidence of selected sexually transmitted infections *Chlamydia*  
834 *trachomatis*, *Neisseria gonorrhoeae*, syphilis and *Trichomonas vaginalis*: methods and results  
835 used by WHO to generate 2005 estimates. World Health Organization, Geneva. 2011.
- 836 2. Gerbase AC, Rowley JT, Mertens TE. Global epidemiology of sexually transmitted  
837 diseases. *The Lancet*. 1998;351.
- 838 3. CDC. 2018 Sexually Transmitted Disease Surveillance. Atlanta, GA: US Department of  
839 Health and Human Services: Centers for Disease Control and Prevention. 2019.
- 840 4. Savage EJ, Marsh K, Duffell S, Ison CA, Zaman A, Hughes G. Rapid increase in  
841 gonorrhoea and syphilis diagnoses in England in 2011. *Euro Surveill*. 2012;17(29). PubMed  
842 PMID: 22835469.
- 843 5. Savage EJ, Hughes G, Ison C, Lowndes CM. Syphilis and gonorrhoea in men who have  
844 sex with men: a European overview. *Euro Surveill*. 2009;14(47). PubMed PMID: 19941803.
- 845 6. Simms I, Fenton KA, Ashton M, Turner KM, Crawley-Boevey EE, Gorton R, et al. The  
846 re-emergence of syphilis in the United Kingdom: the new epidemic phases. *Sex Transm Dis*.  
847 2005;32(4):220-6. PubMed PMID: 15788919.

- 848 7. Tucker JD, Cohen MS. China's syphilis epidemic: epidemiology, proximate determinants  
849 of spread, and control responses. *Curr Opin Infect Dis*. 2011;24(1):50-5. PubMed PMID:  
850 21150594.
- 851 8. Jin F, Prestage GP, Kippax SC, Pell CM, Donovan BJ, Kaldor JM, et al. Epidemic  
852 syphilis among homosexually active men in Sydney. *Med J Aust*. 2005;183(4):179-83. PubMed  
853 PMID: 16097913.
- 854 9. LaFond RE, Lukehart SA. Biological basis for syphilis. *Clin Microbiol Rev*.  
855 2006;19(1):29-49. PubMed PMID: 16418521.
- 856 10. Goldenberg RL, Thompson C. The infectious origins of stillbirth. *Am J Obstet Gynecol*.  
857 2003;189(3):861-73. PubMed PMID: 14526331.
- 858 11. Edmondson DG, Hu B, Norris SJ. Long-Term In Vitro Culture of the Syphilis Spirochete  
859 *Treponema pallidum* subsp. *pallidum*. *mBio*. 2018;9(3). Epub 2018/06/28. doi:  
860 10.1128/mBio.01153-18. PubMed PMID: 29946052; PubMed Central PMCID:  
861 PMC6020297.
- 862 12. Fieldsteel AH, Cox DL, Moeckli RA. Cultivation of virulent *Treponema pallidum* in  
863 tissue culture. *Infect Immun*. 1981;32(2):908-15.
- 864 13. Giacani L, Iverson-Cabral SL, King JC, Molini BJ, Lukehart SA, Centurion-Lara A.  
865 Complete Genome Sequence of the *Treponema pallidum* subsp. *pallidum* Sea81-4 Strain.  
866 *Genome Announc*. 2014;2(2). PubMed PMID: 24744342.
- 867 14. Weigel LM, Brandt ME, Norgard MV. Analysis of the N-terminal region of the 47-  
868 kilodalton integral membrane lipoprotein of *Treponema pallidum*. *Infect Immun*.  
869 1992;60(4):1568-76. PubMed PMID: 9252185.

- 870 15. Smajs D, McKevitt M, Howell JK, Norris SJ, Cai WW, Palzkill T, et al. Transcriptome of  
871 *Treponema pallidum*: gene expression profile during experimental rabbit infection. J Bacteriol.  
872 2005;187(5):1866-74.
- 873 16. Giacani L, Molini B, Godornes C, Barrett L, Van Voorhis WC, Centurion-Lara A, et al.  
874 Quantitative analysis of *tpr* gene expression in *Treponema pallidum* isolates: differences among  
875 isolates and correlation with T-cell responsiveness in experimental syphilis. Infect Immun.  
876 2007;75(1):104-12.
- 877 17. Skarstad K, Katayama T. Regulating DNA replication in bacteria. Cold Spring Harb  
878 Perspect Biol. 2013;5(4):a012922. Epub 2013/03/09. doi: 10.1101/cshperspect.a012922.  
879 PubMed PMID: 23471435; PubMed Central PMCID: PMC3683904.
- 880 18. Leonard AC, Méchali M. DNA Replication Origins. Cold Spring Harb Perspect Biol.  
881 2013;5(10). doi: 10.1101/cshperspect.a010116. PubMed PMID: 23838439; PubMed Central  
882 PMCID: PMC3783049.
- 883 19. Chi B, Chauhan S, Kuramitsu H. Development of a system for expressing heterologous  
884 genes in the oral spirochete *Treponema denticola* and its use in expression of the *Treponema*  
885 *pallidum* *flaA* gene. Infect Immun. 1999;67(7):3653-6. Epub 1999/06/22. doi:  
886 10.1128/iai.67.7.3653-3656.1999. PubMed PMID: 10377154; PubMed Central PMCID:  
887 PMC116559.
- 888 20. Chan K, Nasereddin T, Alter L, Centurion-Lara A, Giacani L, Parveen N. *Treponema*  
889 *pallidum* Lipoprotein TP0435 Expressed in *Borrelia burgdorferi* Produces Multiple  
890 Surface/Periplasmic Isoforms and mediates Adherence. Sci Rep. 2016;6:25593. PubMed PMID:  
891 27161310.



- 892 21. Cameron CE, Kuroiwa JM, Yamada M, Francescutti T, Chi B, Kuramitsu HK.  
893 Heterologous expression of the *Treponema pallidum* laminin-binding adhesin Tp0751 in the  
894 culturable spirochete *Treponema phagedenis*. *J Bacteriol.* 2008;190(7):2565-71. PubMed PMID:  
895 18263731.
- 896 22. Wang Y, Kahane S, Cutcliffe LT, Skilton RJ, Lambden PR, Clarke IN. Development of a  
897 transformation system for *Chlamydia trachomatis*: restoration of glycogen biosynthesis by  
898 acquisition of a plasmid shuttle vector. *PLoS Pathog.* 2011;7(9):e1002258. Epub 2011/10/04.  
899 doi: 10.1371/journal.ppat.1002258. PubMed PMID: 21966270; PubMed Central PMCID:  
900 PMC3178582.
- 901 23. Grillová L, Oppelt J, Mikalová L, Nováková M, Giacani L, Niesnerová A, et al. Directly  
902 Sequenced Genomes of Contemporary Strains of Syphilis Reveal Recombination-Driven  
903 Diversity in Genes Encoding Predicted Surface-Exposed Antigens. *Front Microbiol.*  
904 2019;10:1691. Epub 2019/08/17. doi: 10.3389/fmicb.2019.01691. PubMed PMID: 31417509;  
905 PubMed Central PMCID: PMC6685089.
- 906 24. Arora N, Schuenemann VJ, Jager G, Peltzer A, Seitz A, Herbig A, et al. Origin of  
907 modern syphilis and emergence of a pandemic *Treponema pallidum* cluster. *Nat Microbiol.*  
908 2016;2:16245. PubMed PMID: 27918528.
- 909 25. Staudova B, Strouhal M, Zbanikova M, Cejkova D, Fulton LL, Chen L, et al. Whole  
910 genome sequence of the *Treponema pallidum* subsp. endemicum strain Bosnia A: the genome is  
911 related to yaws treponemes but contains few loci similar to syphilis treponemes. *PLoS Negl Trop*  
912 *Dis.* 2014;8(11):e3261. PubMed PMID: 25375929.

- 913 26. Smajs D, Norris SJ, Weinstock GM. Genetic diversity in *Treponema pallidum*:  
914 Implications for pathogenesis, evolution and molecular diagnostics of syphilis and yaws. *Infect*  
915 *Genet Evol.* 2012;12(2):191-202. PubMed PMID: 22198325.
- 916 27. Houston S, Lithgow KV, Osbak KK, Kenyon CR, Cameron CE. Functional insights from  
917 proteome-wide structural modeling of *Treponema pallidum* subspecies *pallidum*, the causative  
918 agent of syphilis. *BMC Struct Biol.* 2018;18(1):7. Epub 2018/05/18. doi: 10.1186/s12900-018-  
919 0086-3. PubMed PMID: 29769048; PubMed Central PMCID: PMC5956850.
- 920 28. Falkow S. Molecular Koch's postulates applied to microbial pathogenicity. *Rev Infect*  
921 *Dis.* 1988;10 Suppl 2:S274-6. Epub 1988/07/01. doi: 10.1093/cid/10.supplement\_2.s274.  
922 PubMed PMID: 3055197.
- 923 29. Bastidas RJ, Valdivia RH. Emancipating Chlamydia: Advances in the Genetic  
924 Manipulation of a Recalcitrant Intracellular Pathogen. *Microbiol Mol Biol Rev.* 2016;80(2):411-  
925 27. Epub 2016/04/01. doi: 10.1128/membr.00071-15. PubMed PMID: 27030552; PubMed Central  
926 PMCID: PMC4867370.
- 927 30. Gray R, Mulligan C, Molini B, Sun E, Giacani L, Godornes C, et al. Molecular evolution  
928 of the *tprC*, *D*, *I*, *K*, *G*, and *J* genes in the pathogenic genus *Treponema*. *Mol Biol Evol.*  
929 2006;23(11):2220-33. PubMed PMID: 16926243.
- 930 31. Mell JC, Redfield RJ. Natural competence and the evolution of DNA uptake specificity. *J*  
931 *Bacteriol.* 2014;196(8):1471-83. Epub 2014/02/04. doi: 10.1128/jb.01293-13. PubMed PMID:  
932 24488316; PubMed Central PMCID: PMC3993363.
- 933 32. Nordström K, Austin SJ. Mechanisms that contribute to the stable segregation of  
934 plasmids. *Annu Rev Genet.* 1989;23:37-69. Epub 1989/01/01. doi:  
935 10.1146/annurev.ge.23.120189.000345. PubMed PMID: 2694936.

- 936 33. Addetia A, Lin MJ, Phung Q, Xie H, Huang ML, Ciccarese G, et al. Estimation of Full-  
937 Length TprK Diversity in *Treponema pallidum* subsp. *pallidum*. *mBio*. 2020;11(5). Epub  
938 2020/10/29. doi: 10.1128/mBio.02726-20. PubMed PMID: 33109767; PubMed Central PMCID:  
939 PMC7593977.
- 940 34. Giacani L, Brandt SL, Puray-Chavez M, Brinck Reid T, Godornes C, Molini BJ, et al.  
941 Comparative Investigation of the Genomic Regions Involved in Antigenic Variation of the TprK  
942 Antigen among Treponemal Species, Subspecies, and Strains. *J Bacteriol*. 2012;194(16):4208-  
943 25. PubMed PMID: 22661689.
- 944 35. Giacani L, Molini BJ, Kim EY, Godornes BC, Leader BT, Tantalo LC, et al. Antigenic  
945 variation in *Treponema pallidum*: TprK sequence diversity accumulates in response to immune  
946 pressure during experimental syphilis. *J Immunol*. 2010;184(7):3822-9. PubMed PMID:  
947 20190145.
- 948 36. Bhaya D, Davison M, Barrangou R. CRISPR-Cas systems in bacteria and archaea:  
949 versatile small RNAs for adaptive defense and regulation. *Annu Rev Genet*. 2011;45:273-97.  
950 Epub 2011/11/09. doi: 10.1146/annurev-genet-110410-132430. PubMed PMID: 22060043.
- 951 37. Joung JK, Sander JD. TALENs: a widely applicable technology for targeted genome  
952 editing. *Nat Rev Mol Cell Biol*. 2013;14(1):49-55. Epub 2012/11/22. doi: 10.1038/nrm3486.  
953 PubMed PMID: 23169466; PubMed Central PMCID: PMC3547402.
- 954 38. Kim H, Kim JS. A guide to genome engineering with programmable nucleases. *Nat Rev*  
955 *Genet*. 2014;15(5):321-34. Epub 2014/04/03. doi: 10.1038/nrg3686. PubMed PMID: 24690881.
- 956 39. Fraser CM, Norris SJ, Weinstock GM, White O, Sutton GG, Dodson R, et al. Complete  
957 genome sequence of *Treponema pallidum*, the syphilis spirochete. *Science*. 1998;281(5375):375-  
958 88.

- 959 40. Costa A, Hood IV, Berger JM. Mechanisms for Initiating Cellular DNA Replication.  
960 Annu Rev Biochem. 2013;82:25-54. doi: 10.1146/annurev-biochem-052610-094414. PubMed  
961 PMID: 23746253; PubMed Central PMCID: PMC4696014.
- 962 41. Trojanowski D, Hołowka J, Zakrzewska-Czerwińska J. Where and When Bacterial  
963 Chromosome Replication Starts: A Single Cell Perspective. Front Microbiol. 2018;9:2819. Epub  
964 2018/12/12. doi: 10.3389/fmicb.2018.02819. PubMed PMID: 30534115; PubMed Central  
965 PMCID: PMC6275241.
- 966 42. Janier M. Ceftriaxone is effective for treating patients with primary syphilis. Sex Transm  
967 Dis. 1988;15(1):70. Epub 1988/01/01. PubMed PMID: 3358241.
- 968 43. Baker-Zander SA, Fohn MJ, Lukehart SA. Development of cellular immunity to  
969 individual soluble antigens of *Treponema pallidum* during experimental syphilis. J Immunol.  
970 1988;141(12):4363-9.
- 971 44. Giacani L, Hevner K, Centurion-Lara A. Gene organization and transcriptional analysis  
972 of the *tprJ*, *tprI*, *tprG* and *tprF* loci in the Nichols and Sea 81-4 *Treponema pallidum* isolates. J  
973 Bacteriol. 2005;187(17):6084-93.
- 974 45. Bolger AM, Lohse M, Usadel B. Trimmomatic: a flexible trimmer for Illumina sequence  
975 data. Bioinformatics. 2014;30(15):2114-20. Epub 2014/04/04. doi:  
976 10.1093/bioinformatics/btu170. PubMed PMID: 24695404; PubMed Central PMCID:  
977 PMC4103590.
- 978 46. Langmead B, Salzberg SL. Fast gapped-read alignment with Bowtie 2. Nat Methods.  
979 2012;9(4):357-9. Epub 2012/03/06. doi: 10.1038/nmeth.1923. PubMed PMID: 22388286;  
980 PubMed Central PMCID: PMC3322381.

981 47. Kears M, Moir R, Wilson A, Stones-Havas S, Cheung M, Sturrock S, et al. Geneious  
982 Basic: an integrated and extendable desktop software platform for the organization and analysis  
983 of sequence data. *Bioinformatics*. 2012;28(12):1647-9. Epub 2012/05/01. doi:  
984 10.1093/bioinformatics/bts199. PubMed PMID: 22543367; PubMed Central PMCID:  
985 PMC3371832.

986

## 987 **Figure Legends**

988 **Figure 1.** Twenty-week *in vitro* growth curve of SS14 *T. pallidum* cells post-exposure to  
989 *tprAarms-tp0574prom-kan<sup>R</sup>* plasmid in transformation buffer (orange), transformation buffer  
990 alone (pink), media containing kanamycin (black), compared to the wild-type SS14 strain (blue).  
991 RT-PCR: reverse-transcription-PCR; ddPCR: droplet digital PCR; RT-ddPCR: reverse-  
992 transcription droplet digital PCR; WGS: whole-genome sequencing; KSA: kanamycin  
993 susceptibility assay; qPCR: quantitative PCR.

994

995 **Figure 2. (A)** Schematic of the recombination event that led to the *tprA<sup>ko</sup>*-SS14 strain. Primer  
996 positions are indicated by color-coded arrows. Amplicon sizes (bp) generated by the different  
997 primer combinations are reported in the legend. **(B)** Amplification reactions using the primer  
998 combinations in panel A on DNA (sub-panels a-f) or cDNA (sub-panels g and h) template from  
999 the *tprA<sup>ko</sup>*- and wt- SS14 strain harvested at Passage #8 post-transformation. M: molecular size  
1000 marker (bp); A<sup>ko</sup>: *tprA<sup>ko</sup>*-SS14, W: wt-SS14; N: no-template control, P: *tprAarms-tp0574prom-*  
1001 *kan<sup>R</sup>* plasmid DNA template.

1002

1003 **Figure 3.** Droplet digital PCR (ddPCR) on DNA template from the *tprA*<sup>ko</sup>- and wt- SS14 strain  
1004 harvested at Passage #8 post-transformation showing ratios between the *kan*<sup>R</sup>, *dnaA*, and *tprA*  
1005 targets. *tprA:dnaA* ratio for the *tprA*<sup>ko</sup>-SS14 strain was 0.006. The *kan*<sup>R</sup>:*dnaA* ratio for the wt-  
1006 SS14 was zero.

1007

1008 **Figure 4.** Whole-genome sequencing of DNA template from the *tprA*<sup>ko</sup>- and wt-SS14 strain  
1009 harvested at Passage #9 post-transformation. (A) *tprA*<sup>ko</sup>-SS14 reads assembled to the wt-SS14  
1010 genome sequence (NC\_021508.1/CP004011.1) showing a gap where the *tprA* locus previously  
1011 was. (B) *tprA*<sup>ko</sup>-SS14 reads assembled to the wt-SS14 genome sequence where the *tprA* locus  
1012 was replaced *in silico* with the *tp0574*promoter-*kan*<sup>R</sup> sequence showing reads aligning to the  
1013 *tp0574*promoter-*kan*<sup>R</sup> sequence. (C) Reads from the wt-SS14 genome (sequenced here as  
1014 control) aligned to the SS14 reference genome (NC\_021508.1/CP004011.1) showing the  
1015 integrity of the *tprA* locus. (D) Reads from the wt-SS14 genome (sequenced here as control)  
1016 aligned to the *tprA*<sup>ko</sup>-SS14 genome showing a gap where the *tp0574*promoter-*kan*<sup>R</sup> sequence is  
1017 located.

1018

1019 **Figure 5.** Kanamycin susceptibility assay for the wt-SS14 strain (A) and the *tprA*<sup>ko</sup>-SS14 (B). In  
1020 panel A, values (mean ± SD) for Day 0 and Day 1 are 8.95 (±1.6) and 209.6 (±12.2),  
1021 respectively. In panel B, values for Day 0 and Day 1 (mean ± SD) are 18.0 (±1.8) and 315.6  
1022 (±14.7), respectively. mH<sub>2</sub>O: molecular grade water. DNA was extracted from the 8 replicate  
1023 *tprA*<sup>ko</sup>-SS14 cultures propagated in 200 µg/ml of kanamycin and tested with primers targeting  
1024 the pUC57 vector backbone (panel C) used for transformation, showing lack of amplification.  
1025 Wells 1-8: DNA template from the 8 replicate cultures; NTC: no template control; N: wt-SS14

1026 strain DNA; P: *ptprAarms-tp0574prom-kan<sup>R</sup>* plasmid DNA template; M: molecular size marker.  
1027 Expected amplicon size in ~3Kb. (D) DNA was extracted from the 8 replicate *tprA<sup>ko</sup>*-SS14  
1028 cultures propagated in 200 µg/ml of kanamycin and tested with primers targeting *T. pallidum*  
1029 genomic region right outside of the *tprA* homology arms (primers in Table 1), showing that in  
1030 the *tprA<sup>ko</sup>*-SS14 strain a smaller amplicon is obtained due to the replacement of *tprA* by the *kan<sup>R</sup>*  
1031 gene, which is approximately 1Kb shorter in size. Wild-type SS14 DNA template yielded a  
1032 longer amplicon due to an intact *tprA* locus still in place. No amplification was detected using  
1033 the transformation plasmid DNA control. NTC: no template control; W: wt-SS14 strain DNA; P:  
1034 *ptprAarms-tp0574prom-kan<sup>R</sup>* plasmid DNA template; M: molecular size marker (Kbp).

1035

1036 **Figure 6.** Droplet digital PCR (ddPCR) on DNA or cDNA template from the *tprA<sup>ko</sup>*- and wt-  
1037 SS14 strain propagated in different kanamycin concentrations (*tprA<sup>ko</sup>*-SS14) or no antibiotic (wt-  
1038 SS14). (A) *kan<sup>R</sup>:dnaA* gene copy number ratio. (B) *tprA:dnaA* gene copy number ratio. (C)  
1039 *kan<sup>R</sup>/tp0574* gene copy number ratio. (D) *kan<sup>R</sup>:tp0574* mRNA ratio. NTC: no template control.

1040

1041 **Figure 7.** Droplet digital PCR (ddPCR) on DNA template from the *tprA<sup>ko</sup>*- and wt- SS14 strain  
1042 propagated in rabbits to which kanamycin was (w/) or was not (w/o) given. The only IACUC-  
1043 approved administration route for kanamycin, however, resulted in treatment failure in rabbits  
1044 infected with the wt-SS14 strain. *tprA:dnaA* ratio for the *tprA<sup>ko</sup>*-SS14 strain was 0.007;  
1045 *kan<sup>R</sup>:dnaA* ratio for the wt-SS14 strains was zero.

1046

1047 **Figure 8.** Mass spectrometry coverage of the Kan<sup>R</sup> protein expressed by the *tprA<sup>ko</sup>*-SS14 strain.  
1048 Orange sequences were experimentally identified. Light gray sequences were not. Protein

1049 coverage is 77%. If two identified peptides are adjacent, one is underlined. Overall, the Kan<sup>R</sup>  
1050 protein represented 1% of all proteins identified in the specimen.

1051

1052 **Figure 9.** Expansion of the *tprA*<sup>ko</sup>-SS14 culture after inoculation of a limited number of  
1053 treponemal cells. Two weeks past inoculation (P1), no *tprA*-specific signal could be detected by  
1054 ddPCR, while the ratio *kan*<sup>R</sup>:*dnaA* was virtually 1. The same results were obtained four weeks  
1055 after inoculation (P2).



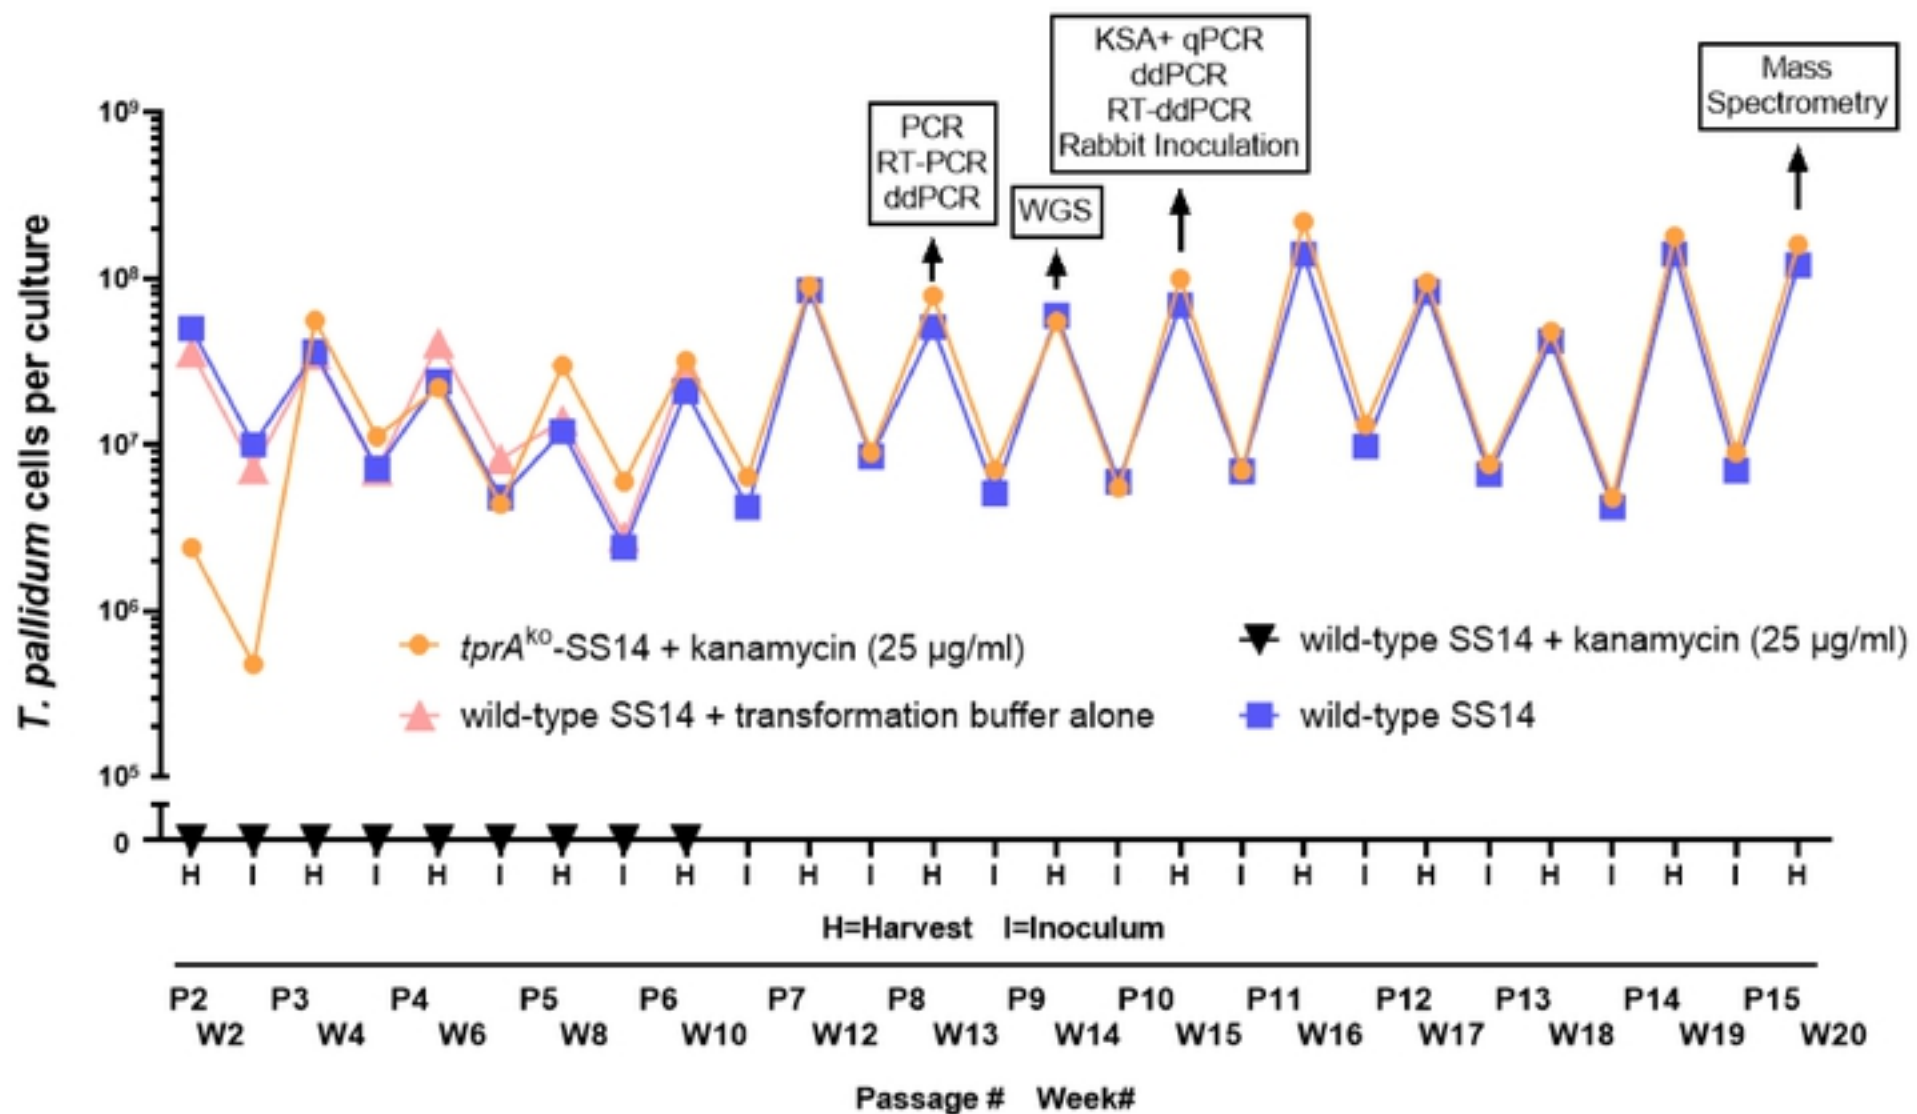

Figure 1

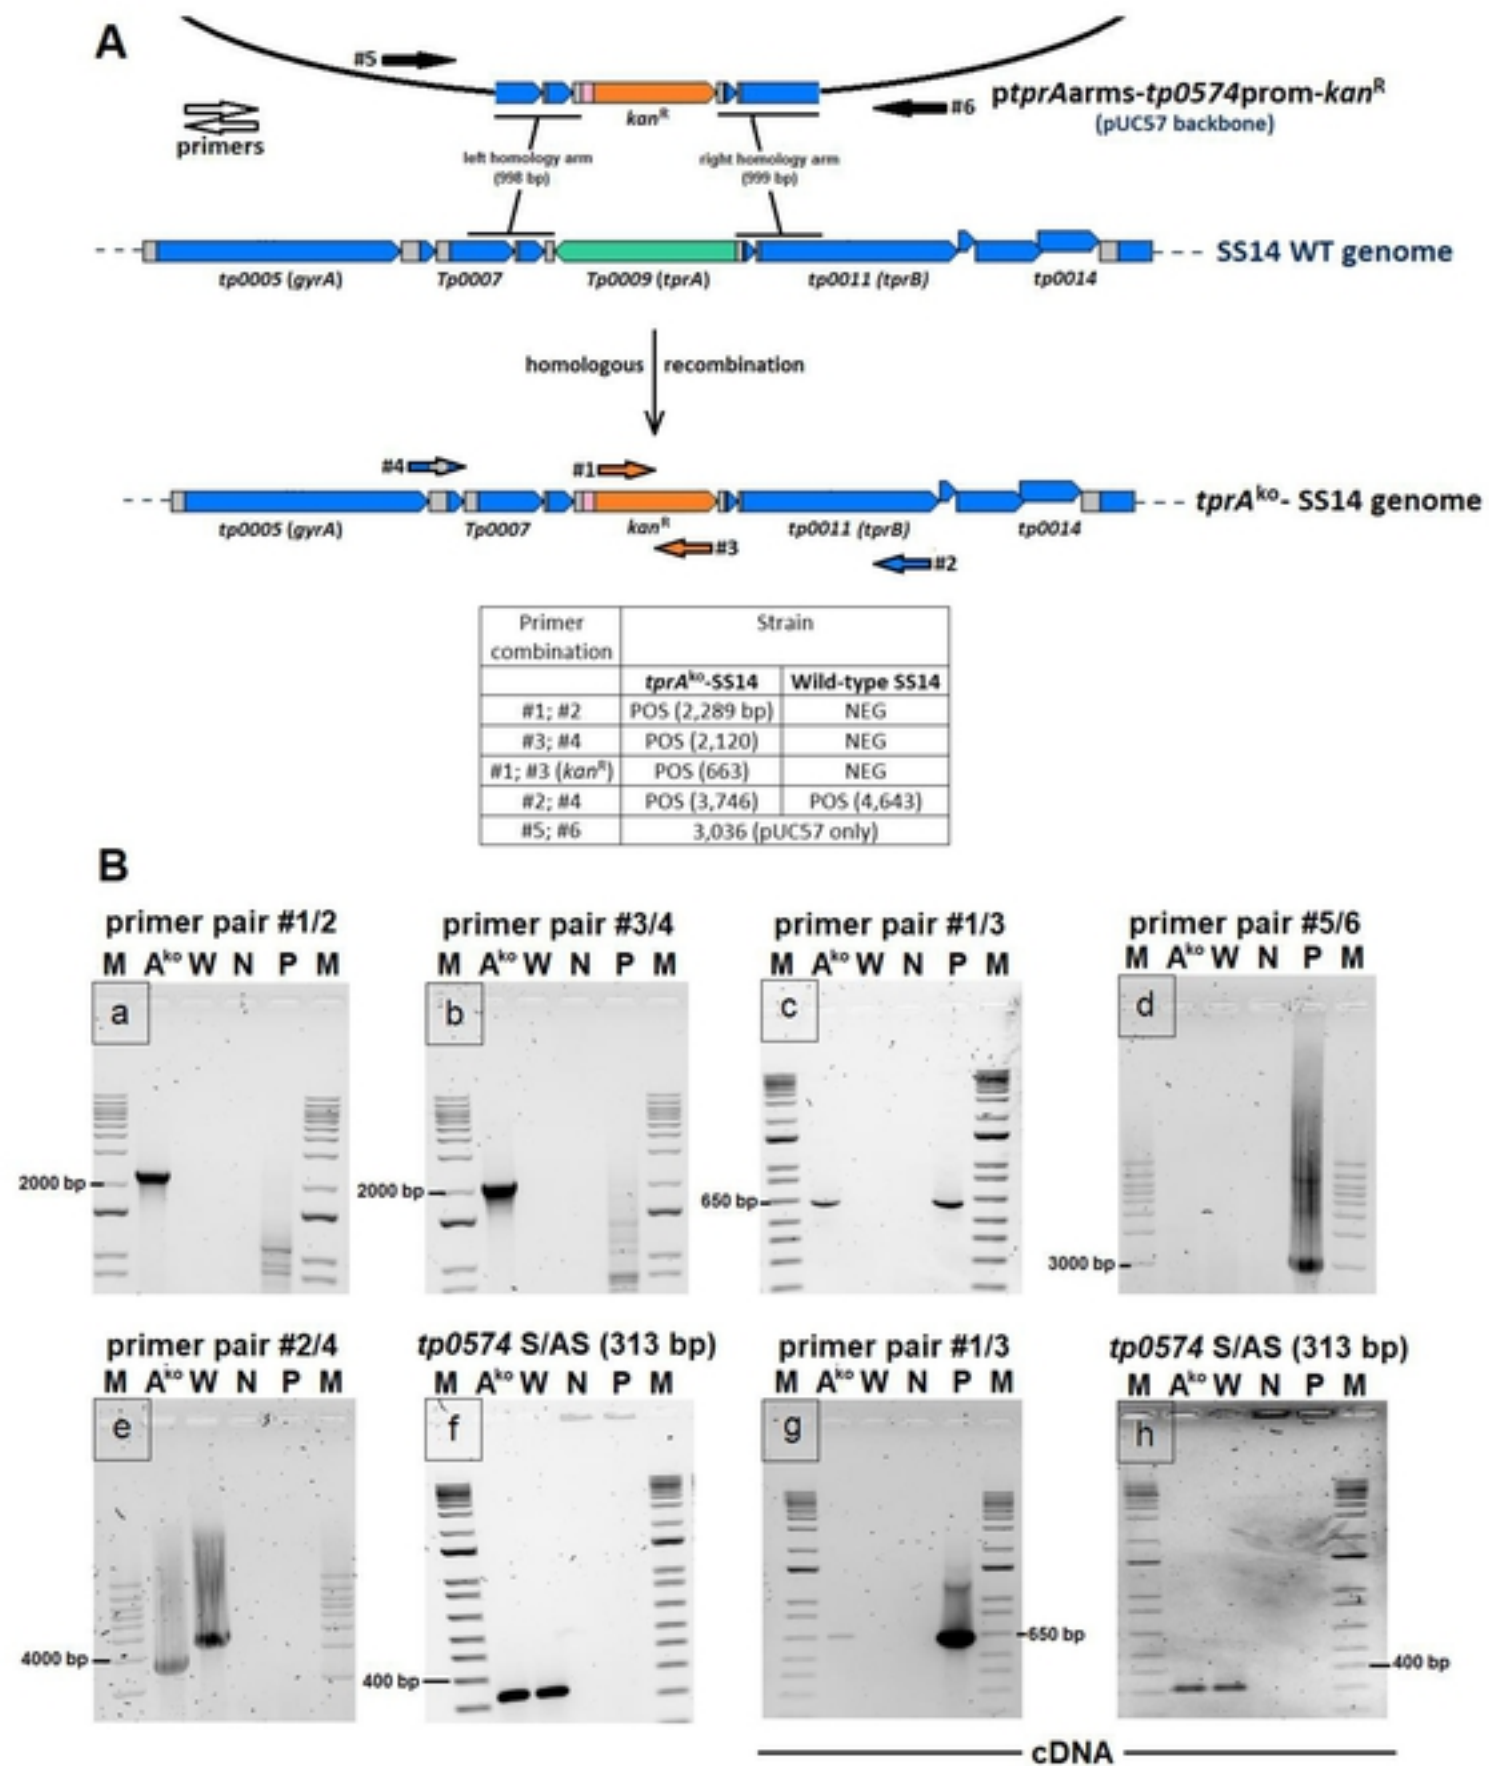

Figure 2

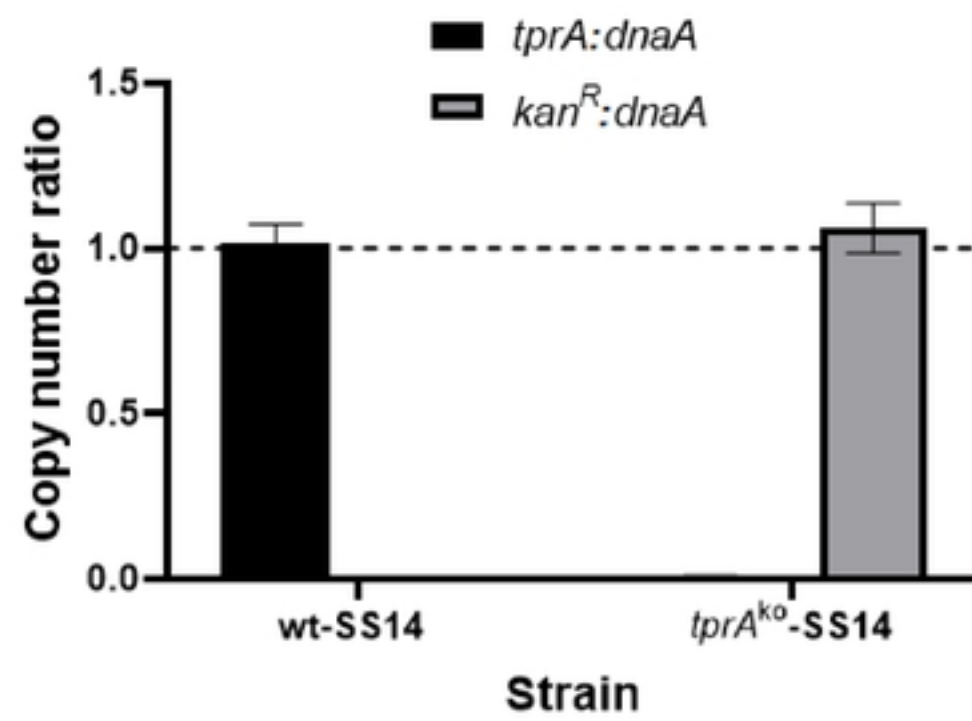

Figure 3

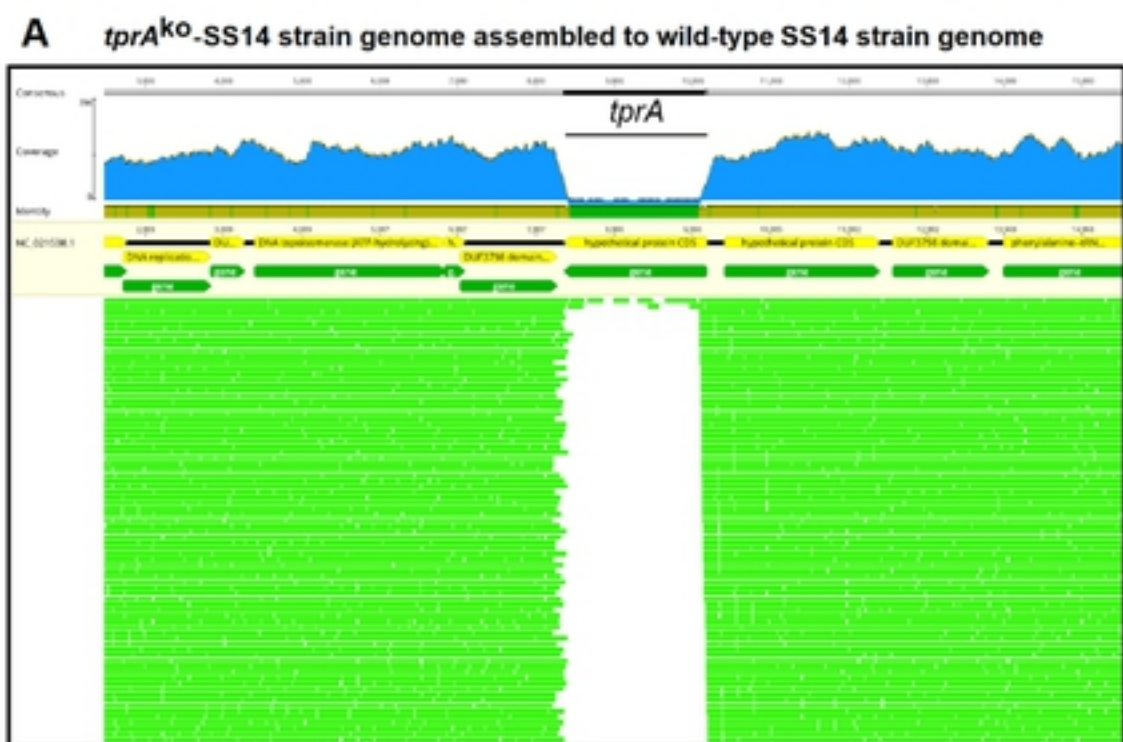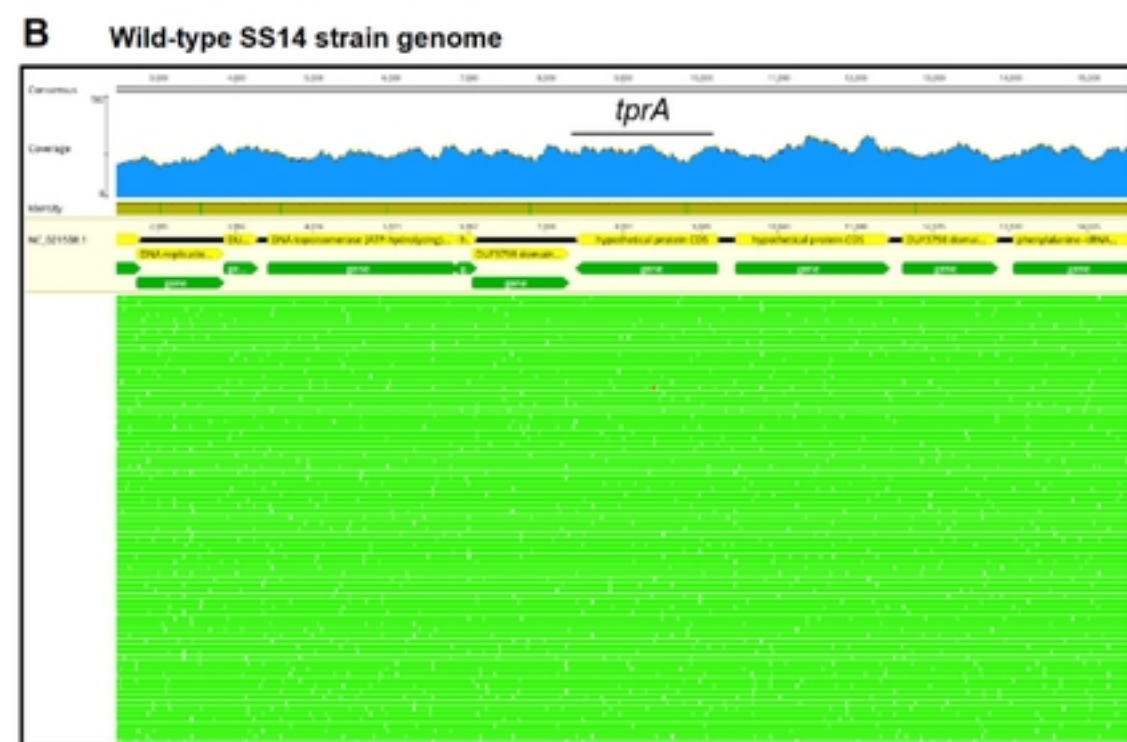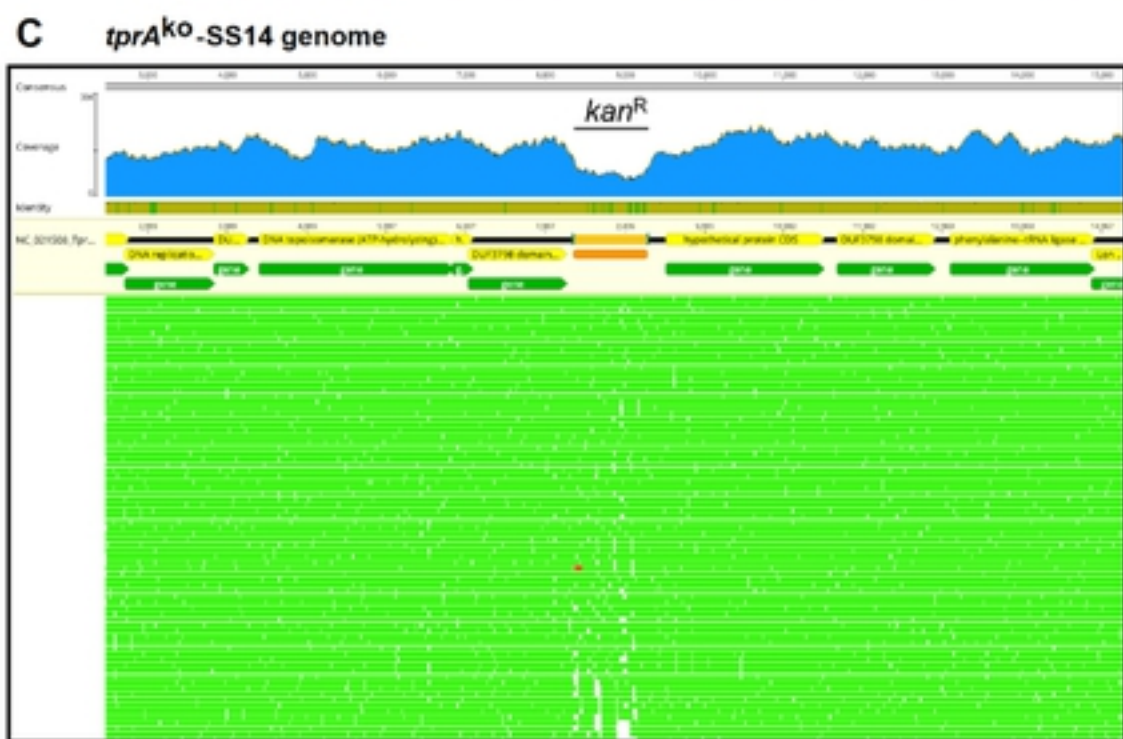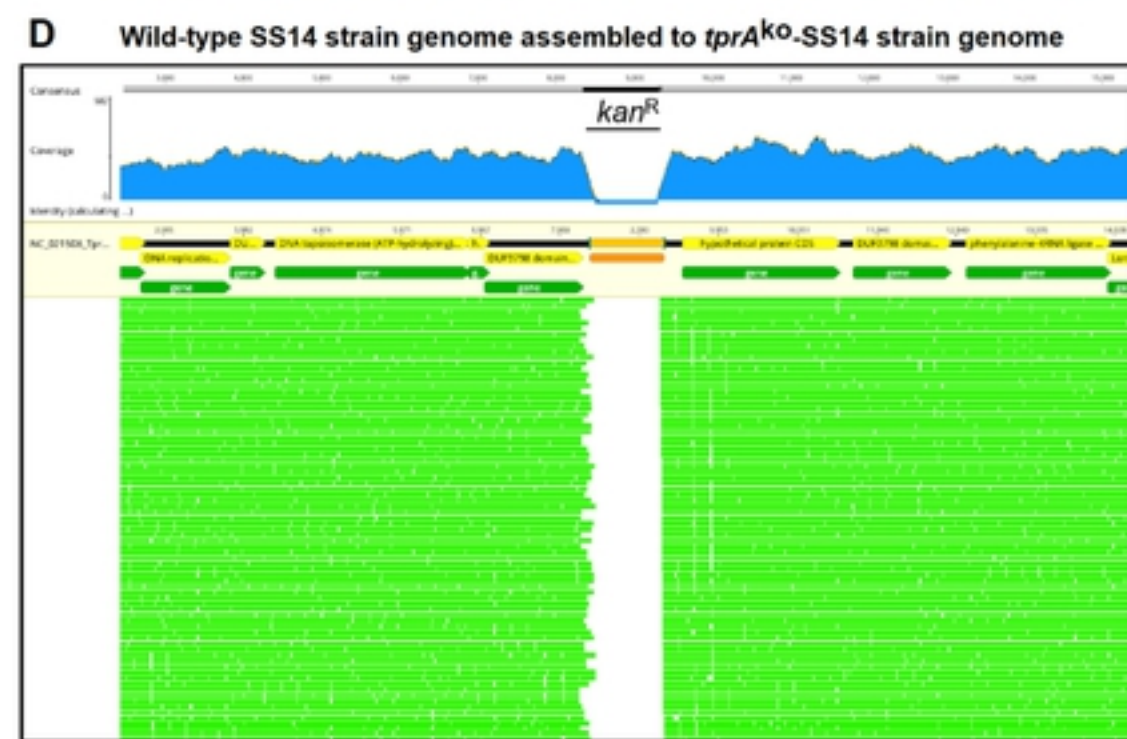

Figure 4

**A**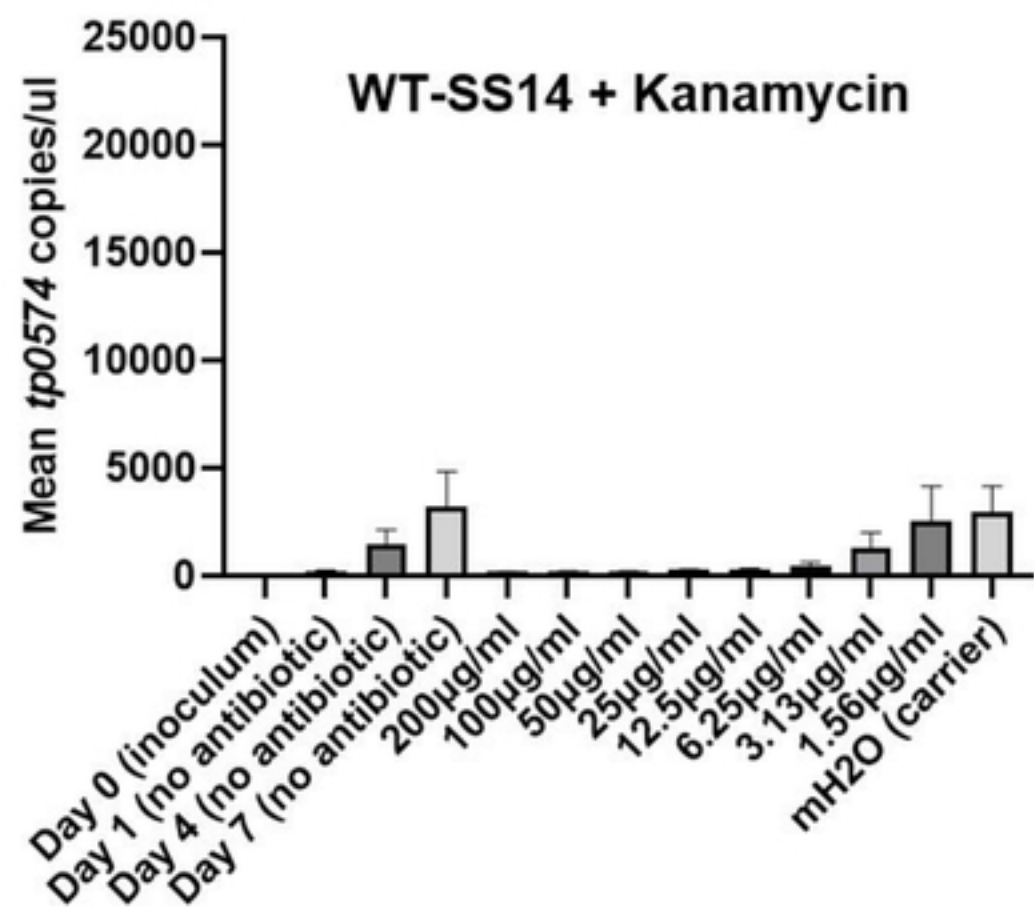**B**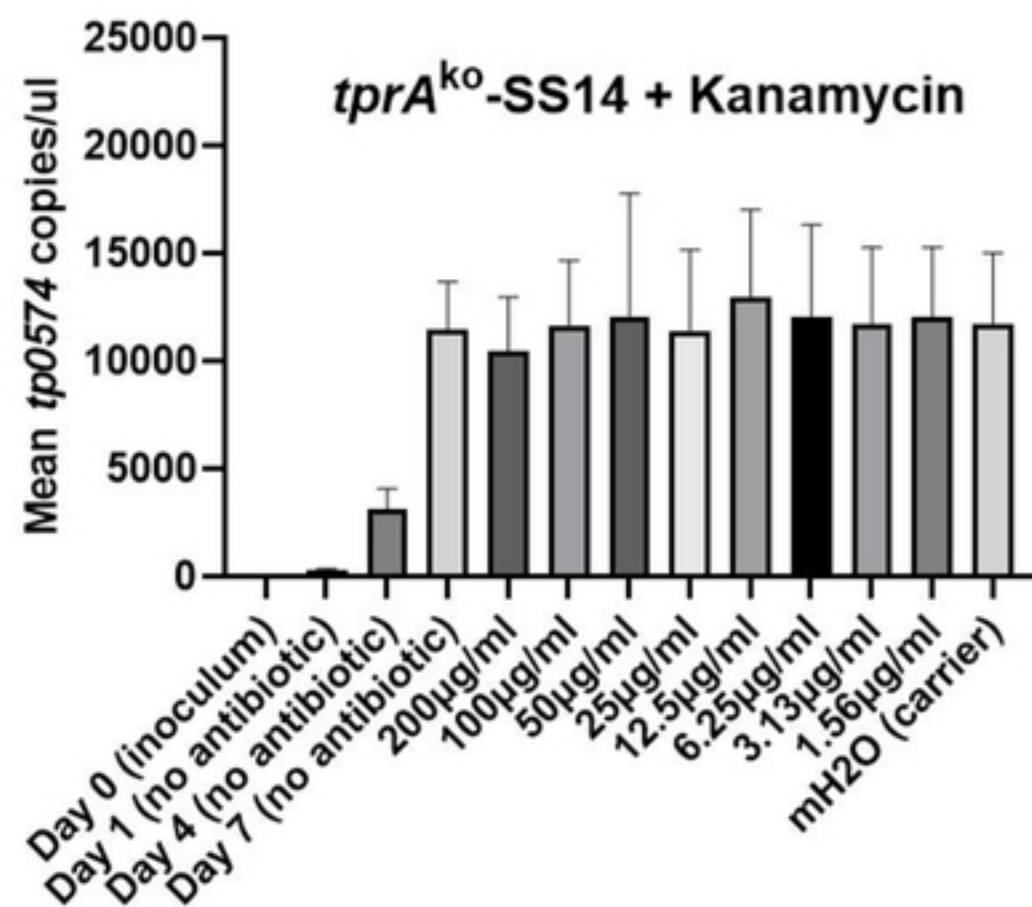**C**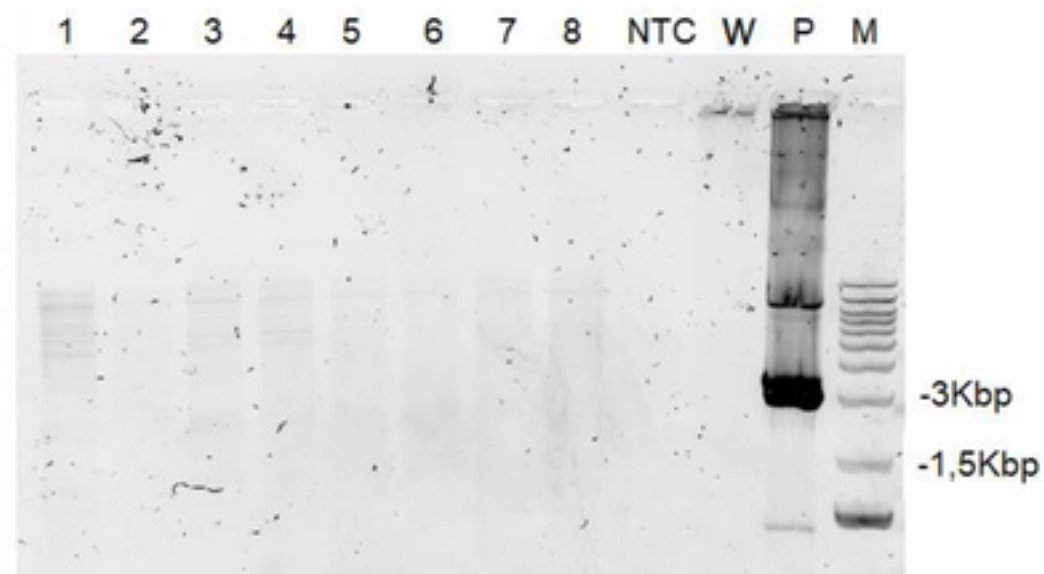**D**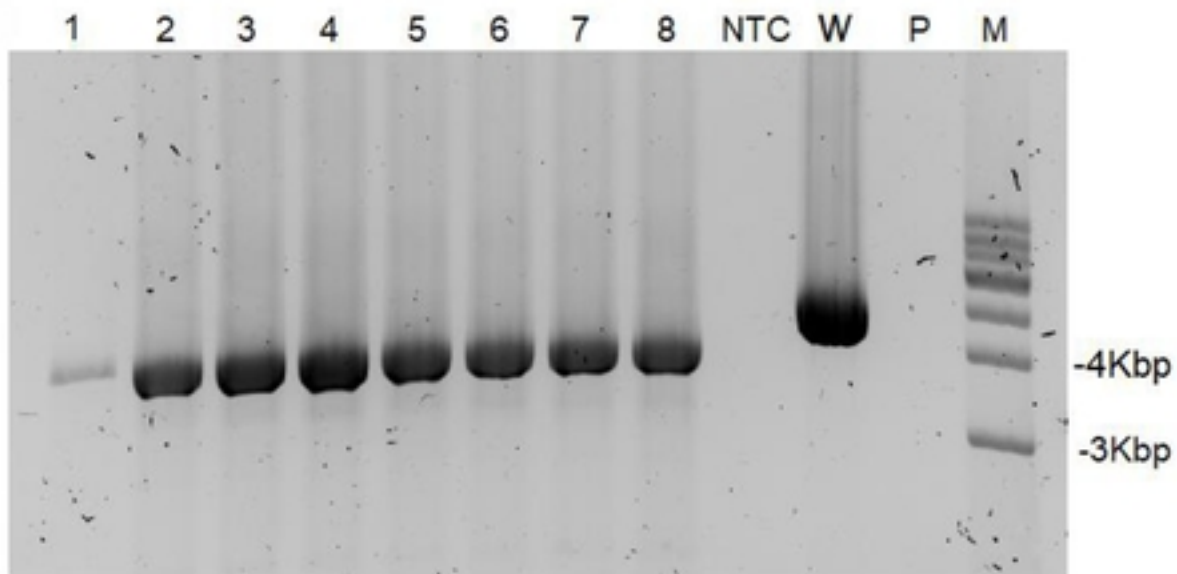

Figure 5

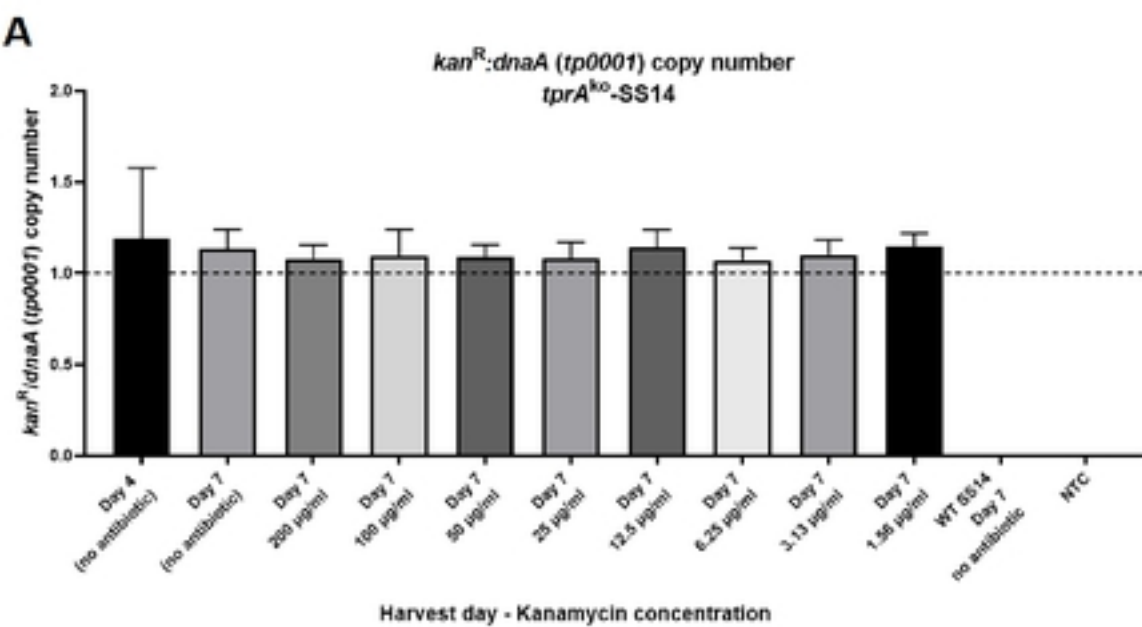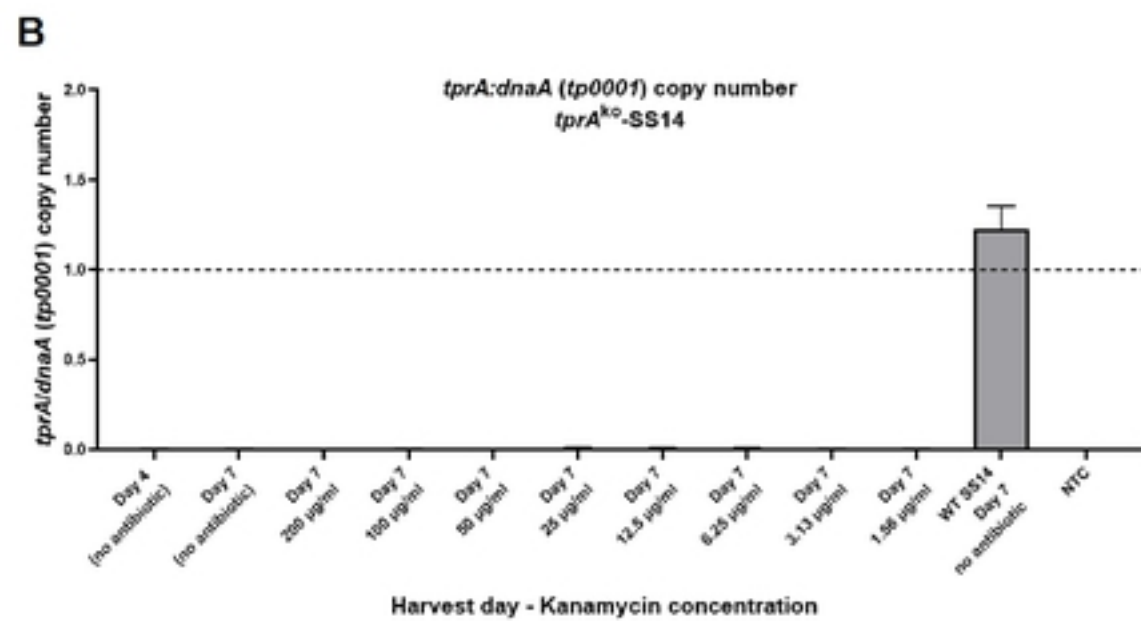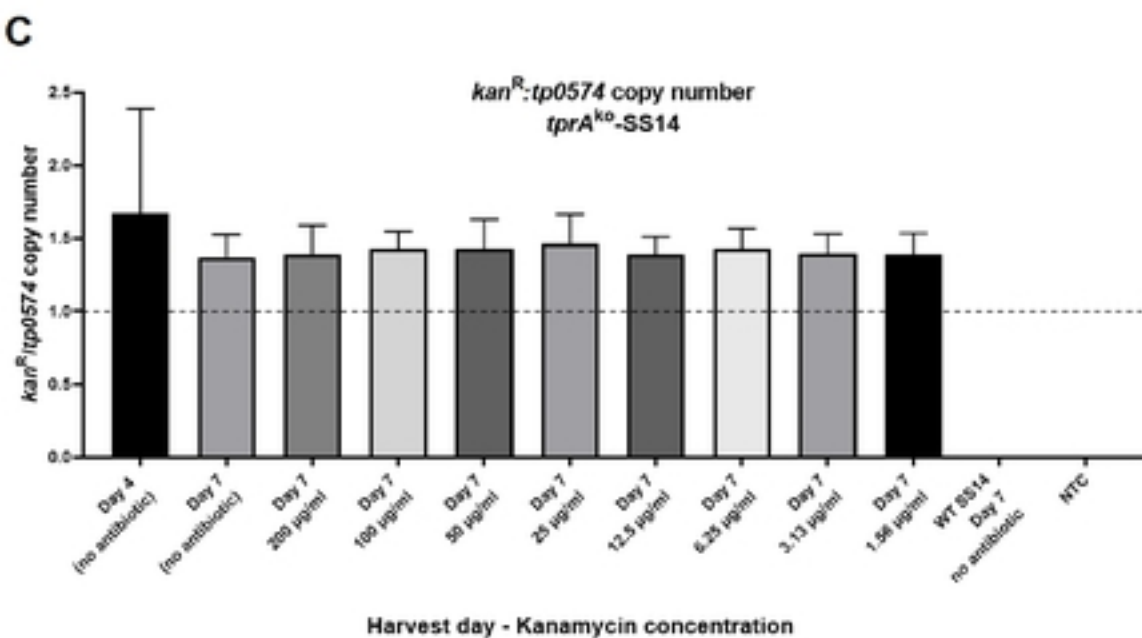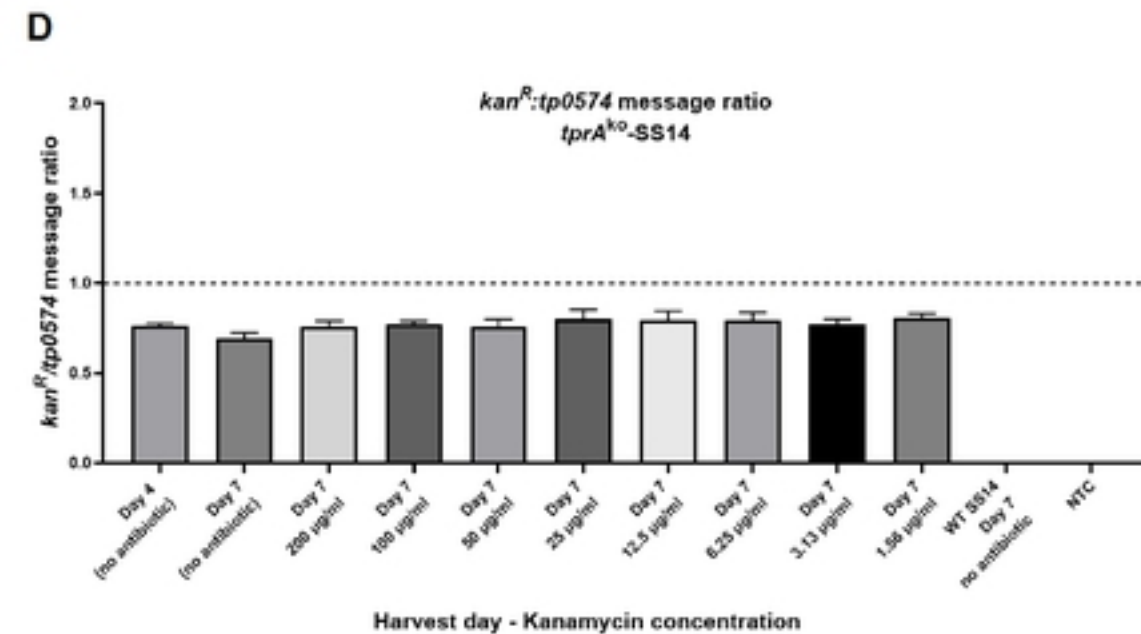

Figure 6

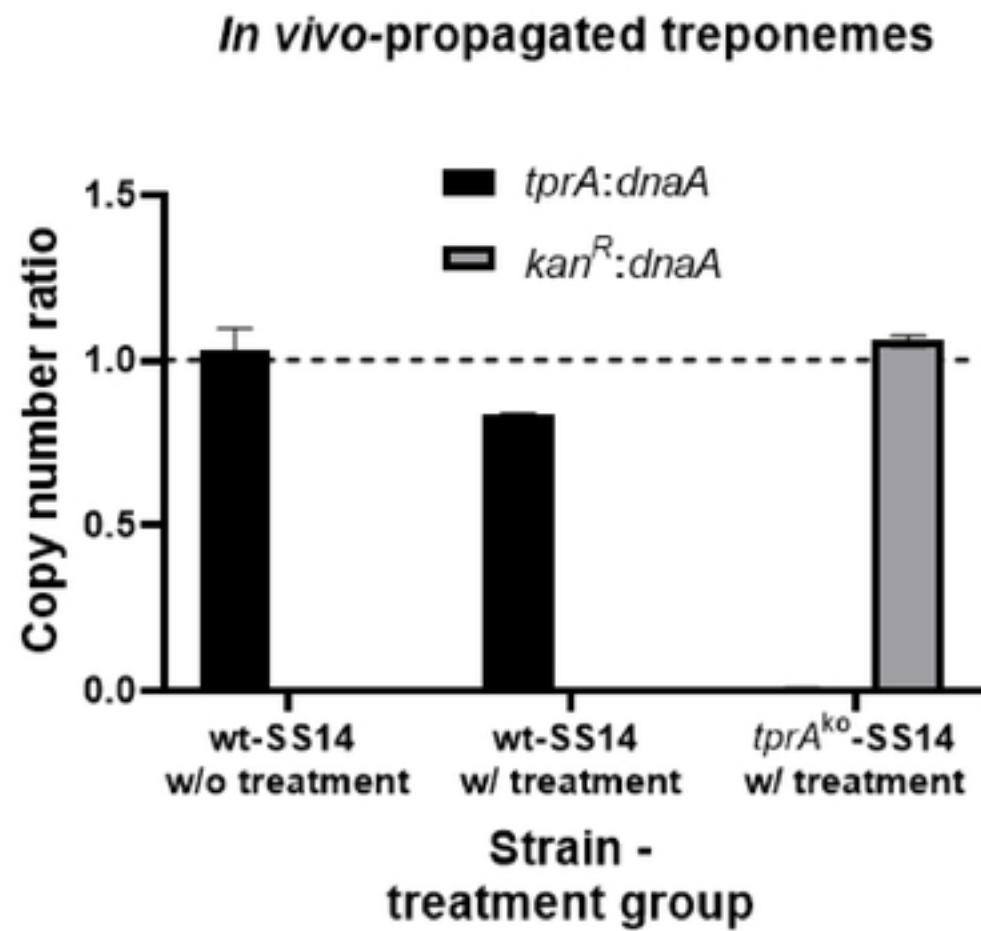

Figure 7

MSHIQRETSCSRPRLNSNLDADLYGYRWARDNVGQSGATIYRLYGKPAPELFLKHGKGSVANDVTDEMVRLNWLTAFMPLPTIKHFIRTPDDAWLL  
TTAIPGKTAHQVLEEYPSGENIVDALAAFLRRLHSIPVCNCPFNDRVFRLTQAQSRMNGLVDASDFDDEKNGWPVEQVWKEMHKLLPFSPDSV  
THGDFSLDNLIFDEGKLIGCIDVGRVGIADRYQDLAILWNCLGEFSPSLQKRFFYKYGIDNPDMNKLQFHLMLDEFF



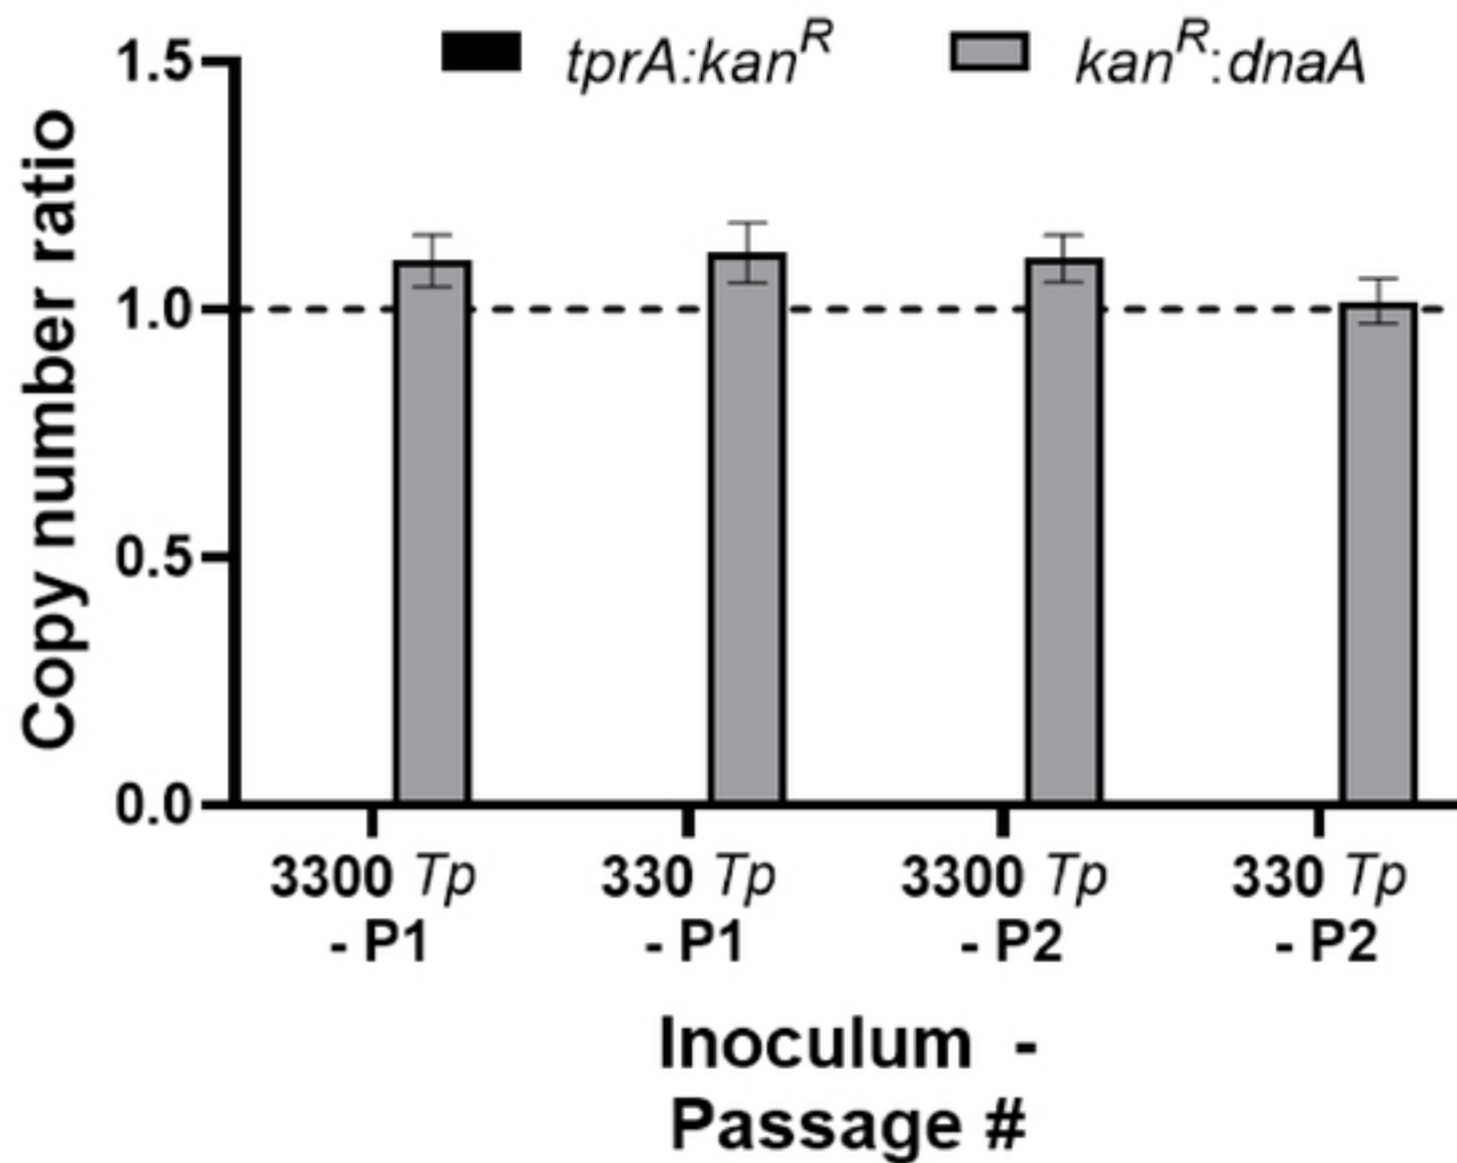

Figure 9
